## ELICE16INDURES<sup>®</sup>: a plant immune-priming activator targeting jasmonate metabolism via TIFY and RHOMBOID proteins in *Hordeum vulgare*

Géza Hegedűs<sup>1,2</sup>, Márta Kiniczky<sup>1</sup>, Ágnes Nagy<sup>1</sup>, Péter Pekker<sup>3</sup>, Balázs Lang<sup>4</sup>, Lajos Gracza<sup>4</sup>, József Péter Pallos<sup>1</sup>, Zsófia Thomas-Nyári<sup>1</sup>, Kincső Decsi<sup>5</sup>, Barbara Kutasy<sup>5</sup>, Kinga Székvári<sup>2</sup>, Ákos Juhász<sup>6</sup>, Eszter Virág<sup>1,2,7\*</sup>

<sup>1</sup>Research Institute for Medicinal Plants and Herbs Ltd. Luppaszigeti str 4, Budakalász, Hungary, 2011

<sup>2</sup>EduCoMat Ltd., Iskola str 12A, Keszthely, Hungary, 8360

<sup>3</sup>University of Pannonia, Research Institute of Biomolecular and Chemical Engineering, Nanolab, Egyetem str 10, Veszprém, Hungary, 8200

<sup>4</sup>Plant-Art Research Ltd, Ébner György Köz 5, Budaörs, Hungary, 2040

<sup>5</sup>Department of Plant Physiology and Plant Ecology, Campus Keszthely, Hungarian University of Agriculture and Life Sciences Georgikon, 7 Festetics Str., Keszthely, Hungary, 8360

<sup>6</sup>Department of Microbiology and Applied Biotechnology, Institute of Genetics and Biotechnology, Hungarian University of Agriculture and Life Sciences, Páter Károly street 1, Gödöllő, Hungary, 2100

<sup>7</sup>Department of Molecular Biotechnology and Microbiology, Institute of Biotechnology, Faculty of Science and Technology, University of Debrecen, Egyetem square 1, Hungary, 4032

\*Corresponding author: [virag.e@gynki.hu](mailto:virag.e@gynki.hu), [eszterandreavirag@gmail.com](mailto:eszterandreavirag@gmail.com)

**Short title:** Priming response to ELICE16INDURES<sup>®</sup> plant conditioner

**One-sentence summary:** ELICE16INDURES<sup>®</sup> is a plant conditioner agent with a high amount of allelochemicals encapsulated into small multilamellar liposomes and found as an immune priming activator tested in *H. vulgare* field and phytotron cultures.

The author responsible for distribution of materials integral to the findings presented in this article in accordance with the policy described in the Instructions for Authors (<https://academic.oup.com/plcell/pages/General-Instructions>) is: Eszter Virág ([virag.e@gynki.hu](mailto:virag.e@gynki.hu)).

### Abstract

Priming activity of plant-based allelochemicals is advanced research nowadays meaning a high potential in sustainable agriculture. The ELICE16INDURES<sup>®</sup> (RIMPH LTD, Hungary) plant conditioner of CO<sub>2</sub> botanical extracts is rich in plant-active ingredients such as phenolic compounds, alkaloids, and flavonoids formulated in small multilamellar liposomes. This product was investigated *in autumn barley* (*Hordeum vulgare*). Field experiments of ELICE16INDURES showed augmented NDVI values interconnected with higher photosynthetic activity and yield increase. Background of the better vitality of plants was investigated by whole genomic gene expression profiling and showed an enhanced response to wounding, jasmonic acid, oxidative detoxification, and chloroplast activity. Among top50 differentially expressed genes the TIFY domain protein TIFY11B and RHOMBOID-like protein 2 related to JA signaling were up-regulated in field-collected samples. Phytotron experiments of barley were set up to validate and evaluate the transcriptomic effect of ELICE16INDURES. Well-studied priming active agents such as salicylic acid and beta-aminobutyric acid were compared with ELICE16INDURES and confirmed as priming inducer material with positive regulation of TIFY11B, TIFY3B, TIFY9, TIF10A, and RHOMBOID like protein 2 by using NGS GEx and RT-qPCR methods.

## 1 INTRODUCTION

2 The application of natural-based activators is the most innovative and ecologically safe  
3 resolution to increase crop vitality and production. Nowadays sustainable agricultural  
4 production and preservation of biodiversity in agricultural fields pay great attention  
5 worldwide therefore the development of alternative plant protection is in focus avoiding the  
6 use of chemicals: pesticides, nutrients, or soil improvers (Du Jardin, 2015). Many companies  
7 are developing products of biologically active agents (Calvo et al., 2014; Sharma et al., 2014)  
8 based on plant signaling molecules so-called „metabolic enhancers" or "biostimulants" among  
9 which natural vitamins, phytohormones, amino acids, and their derivatives are the most  
10 significant (Ugena et al., 2018). To improve yield and abiotic stress tolerance in agriculturally  
11 important cereal cultures the use of biostimulants is a promising approach, however, less  
12 applied in practice than synthetic ones.

13 The responses to biostimulants were first studied in *Arabidopsis thaliana* (*A. thaliana*,  
14 mouse-ear cress) because this plant has one of the smallest plant genomes (Toscano et al.,  
15 2018; Geelen and Xu, 2020). In this experiment, 127 genes showed at least 3-fold activity  
16 against an untreated plant under the influence of a commercially available biostimulant  
17 formulation. Selivanova et al. (2015) investigated the physiological processes of cucumber  
18 plants under the influence of several commercially available biostimulant products. The  
19 results of the experiment showed an increased plant metabolism as a result of the treatment,  
20 which in turn increased yields. Klokić et al. (2020) examined the effect of biostimulants on  
21 tomato yield characteristics. As a result of the experiment, it can be concluded that the  
22 treatments with 10 different biostimulants influenced the characteristics of the fruits, such as  
23 the total phenol and flavonoid content and the total antioxidant capacity (Klokić et al., 2020).  
24 Špoljarevic et al. examined the activity of antioxidants in strawberry (*Fragaria x ananassa*  
25 *Duch*) leaves in two biostimulant treatments with two nutrient replenishment. The specific  
26 activities of guaiacol peroxidase (GPX), catalase (CAT), ascorbate peroxidase (APX) and  
27 glutathione reductase (GR) were investigated in leaves. Based on the results, it may be  
28 concluded that the values of antioxidant enzymes were higher in the leaves after treatment  
29 with biostimulants and reduced nutrient replenishment. APX and GR showed the highest  
30 activity in the treated plants, and the strongest relationship was also between these two  
31 enzymes, which are enzymes of the ascorbate-glutathione cycle (Špoljarević et al., 2010). Later

32 they summarized the researches on different biostimulants in horticultural plant species with  
33 the conclusion of the effects of physiologically active compounds on plants may depend on  
34 dose, time of treatment, growth conditions, and plant species. Therefore they suggest  
35 intensive research in this field (Parađiković et al., 2019).

36 Some biostimulants may protect plants from a broad range of pathogens by activating  
37 the plant immune system (Burketova et al., 2015; Vargas-Hernandez et al., 2017). The effect  
38 of these materials lies in not targeting pathogens like pesticides or not directly induce immune  
39 response overcoming by pathogenic microbes however, potentiate plant defense mechanism  
40 long term, therefore they are called priming-active or imprimatin-compounds (Noutoshi et al.,  
41 2012). From the point of view of field usage of biostimulants, priming-active materials are the  
42 more cost-effective since the induced resistance may be triggered and optimized. Some  
43 natural and synthetic compounds have demonstrated good priming-inducing activity in  
44 laboratory and field conditions, such as the nonprotein  $\beta$ -aminobutyric acid (BABA) or the  
45 phytohormone salicylic acid (SA) (Beckers and Conrath, 2007; Walters et al., 2014). The effect  
46 of priming-active elicitors on protection and signaling pathways has already been  
47 demonstrated, so its potential use in the field is well-founded and highlighted. From the 20  
48 years of the discovery of these compounds, the mechanisms of plant immune responses are  
49 also gaining more and more light and paving the way for new plant protection strategies  
50 (Schwessinger and Ronald, 2012).

51 Several plant extracts were used as priming agents among which the seed priming gain  
52 in more attention in field crops (Farooq et al., 2019). In these experiments the allelochemicals  
53 such as phenolic compounds, alkaloids, terpenoids, flavonoids, saponins, and steroids may act  
54 beneficially to plant growth, germination reaching higher vitality and resilience (Narwal, 2006;  
55 Adeniyi et al., 2010; Narwal, 2012; Moses et al., 2014; Mujeeb et al., 2014; Latif et al., 2020).  
56 For example, the reduction in mortality and high seedling vigor in tomatoes was reported by  
57 primed tomato seeds with *Azadirachta*, *Chlorophytum*, and *Vinca* (Prabha et al., 2016).  
58 Saponins can enhance nutrient absorption as they are readily soluble in water. Alkaloids,  
59 saponins, and phenolic compounds present in the leaves of various plants are involved in the  
60 production of antioxidant activities and protect the plants against pathogens (Satish et al.,  
61 2007). The strong presence of the above-mentioned phytochemicals was proven in different  
62 extracts of garlic cloves (Divya et al., 2017) and their antimicrobial properties were also

63 investigated against pathogens such as *Fusarium* and *Aspergillus* species (Olusanmi and  
64 Amadi, 2010).

65 An advanced method in priming is the use of nanoparticles in the range of 100-500 nm in size.  
66 Although this technology is in little attention, there are some reports on the positive impact  
67 of their uptake and nutrient delivery applied in foliar and seed priming as well (Dutta, 2018;  
68 Abdel-Aziz et al., 2019). However, the priming with nano-size liposomes as macromolecule  
69 carriers was not yet been reported in plants. Some studies investigated the use of liposomes  
70 to supplement plant growth and overcome acute nutrient deficiency (Karny et al., 2018). The  
71 advantage of liposome encapsulation is to reduce the quantity of bioactive compounds to  
72 reach the same impact. The product ELICE16INDURES® plant conditioner (Research Institute  
73 for Medicinal Plants and Herbs Ltd. Budakalász, Hungary) contains Garlic cloves CO<sub>2</sub> extracts,  
74 and a high amount of above-mentioned allelochemicals encapsulated in 250-350 nm size  
75 multilamellar liposomes.

76 In this study, the transcriptomic effect of ELICE16INDURES was investigated and  
77 compared with BABA and SA priming agents in the field and phytotron experiments on  
78 autumn barley (*Hordum vulgare*). Chloroplast activity predictions were performed by remote  
79 sensing in field cultures. Monitoring the extension of photosynthetic surface in barley cultures  
80 by using agro-drone a higher vitality was detected in the ELICE16INDURES treated plots that  
81 were manifested also in augmented crop yield.

82

## 83 **RESULTS AND DISCUSSION**

84

### 85 **Testing of ELICE16INDURES in field experiments**

#### 86 **Determination of NDVI in field populations of *H. vulgare***

87 The NDVI value provides information on the photosynthetic activity of plants (Kalbi et  
88 al., 2014), i.e. it examines how much of the light in the photosynthetic wavelength range can  
89 be used by the plant. NDVI gives a picture of the differences in vegetation activity and  
90 vegetation rate within the field. This provides useful information for assessing heterogeneity  
91 within the field and may draw attention to the occurrence of any problems or changes within  
92 the field (inland water, prolonged germination, nutrient deficiency, wildlife damage and plant  
93 disease). The development of vegetation can be followed along with the development of NDVI  
94 in each field, the effect of different varieties, hybrids, or different crop production

95 technologies can be compared. True, these are still not exact values, but they can provide  
96 support. In this case, NDVI provides information on the effect of ELICE16INDURES. Using NDVI  
97 spectral analysis we monitored the area as indicated in Figure 2A.

98 Photosynthetic traits are indicators of the physiological status of plants. The higher NDVI value  
99 suggested a larger area with enhanced photosynthetic activity in leaves of investigated barley  
100 culture. This state might have resulted in fewer patients or better assimilation of nutrients,  
101 water, or light. We hypothesized that the higher NDVI values correlated with the healthier leaf  
102 surface. Therefore we chose plot 8 and plot 1 to highlight the background of this phenomenon.  
103 NGS sequencing (GEx) was carried out using plant materials collected in the given plots. We  
104 performed bioinformatics analysis and determined the top50 DEGs (Figure 2C).

105

#### 106 **Determination of DEGs in field populations of *H. vulgare***

107 NGS GEx was performed from randomly collected leaves grown in the two parallel  
108 plots (see Figure 2). Three biological repeats were investigated in both conditions. Among the  
109 top50 DEGs the most interesting genes are detailed in Supplemental Table S1. Results  
110 highlighted an outstanding defense response interconnected with JA pathway and oxidative  
111 regulation. TIFY 11 –like proteins have a role in response to wounding and JA-mediated  
112 immune response. TIFY11 is a member of the family TIFY with a conserved domain taking part  
113 in jasmonate signaling. These proteins may be up-regulated by jasmonate, wounding, and  
114 herbivores. Chung and Howe report on the critical role of the TIFY motif in repression to JA  
115 signaling by a stabilized splice variant of the JASMONATE ZIM-domain protein JAZ10 in *A.*  
116 *thailana* (Chung and Howe, 2009). Our results indicated a strong up-regulation of TIFY11 gene  
117 after two days of ELICE16INDURES treatment in field conditions. This may suggest that  
118 repression of JA pathway was eliminated by TIFY11 protein under ELICE16INDURES conditions,  
119 presumably. This result points out the priming-activity of ELICE16INDURES which may be  
120 associated with JA pathway regulation. JAZ protein family shares a conserved TIFY motif  
121 within the ZIM domain which are key regulators of jasmonate signaling (Thines et al., 2007).  
122 Interestingly we found a strong up-regulation of RHOMBOID-like protein 2 interconnected  
123 with TIFY 11. Rhomboid proteases regulate intramembrane proteolysis recognizing a  
124 distortion in a short stretch of amino acids in a transmembrane region (Kanaoka et al., 2005).  
125 This function is a fundamental mechanism for controlling a wide range of cellular functions.  
126 The relationship of rhomboid proteases with JA pathway was described by (Knopf et al., 2012).

127 They report on RHOMBOID function, with chloroplast rhomboids being involved in allene  
128 oxide synthase (AOS) accumulation in the *A. thailana* inner envelope membrane which is one  
129 of the three key enzymes of the chloroplastic step of JA biosynthesis (Figueiredo et al., 2015).  
130 We found that rhomboids were up-regulated in this experiment suggesting that JA  
131 metabolism was strengthened at the peroxisome-related step involving up-regulation of  
132 peroxidases as well.

133

### 134 **Testing of ELICE16INDURES in phytotron experiments**

135 Exogenous treatment of SA, BABA, ELICE16INDURES, and their combinations were  
136 performed according to the experimental design (Figure 3 A B). Impact on the whole genome  
137 expression profiling of ELICE16INDURES was in focus comparing with SA and BABA well studied  
138 immune-priming activators. The combination of the investigated three agents resulted in 16  
139 samples, that gene expression comparison was helped by mathematical modeling of most  
140 different samples and genes.

141

### 142 **De novo assembly and mapping**

143 The reference transcript dataset (TrinityH16-transcript, Supplemental Data Set S1)  
144 contained 73,301 nucleotide sequences (contigs) that average length was 286 bases with  
145 minimum and maximum length 83 and 1,918 bases.

146 All reads from each biological repeat (3 x 16) were separately mapped against the reference  
147 dataset one and multiple times. Statistic of mapped reads was performed and compared  
148 between all replicates. No significant differences in transcript level and mapping were found  
149 between the biological replicates. Therefore reads derived by the same conditions were  
150 captured as one sample. The combined read sets were then aligned to the reference  
151 containing transcripts. Using this dataset we collapsed unique and common sequence regions  
152 among isoforms into a single linear sequence. In our system, this step allows us to analyze the  
153 “*in silico poled*” replicates as one sample. If there is a difference in the coverage complexity of  
154 a given transcript due to the replication, can be used as average information from the given  
155 transcript, representing a gene. The SuperTranscript (assembly at gene level) (TrinityH16-  
156 supertranscript, Supplemental Data Set S2) contained 60,614 nucleotide sequences, which  
157 were further analyzed.

158

159 **Functional annotation**

160 Functional annotation of TrinityH16-supertranscript reference dataset was performed.  
161 Annotation results are summarized in Supplemental Table S2 that resulted in 58.65 % blast  
162 results in the NCBI nr database.

163

164 **GO categories of the reference transcriptome**

165 The entire annotated data set (TrinityH16-supertranscript) indicated an approximate  
166 functional distribution of GO term categories. To get the most comprehensive information, 2  
167 and 7 levels of categories were taking into account (Supplemental Figure S1). The number and  
168 category distribution indicated a high complexity degree of the data set, which allows further  
169 GO investigations. Annotation results were used to perform expression comparison during  
170 sample-by-sample and gene-by-gene analysis. The high complexity of GO categories  
171 correlated with the complexity of reference transcriptome which base the further  
172 comparisons of samples involved in this dataset.

173

174 **Determination of gene expression profiling in 16 samples**

175 The following relations were determined based on count table RPM values: (i) the  
176 number of individually expressed genes; (ii) samples having the largest differences in the  
177 overall transcription profile; (iii) genes having the greatest changes; (iv) differential  
178 expressions of selected samples.

179

180 **Individually expressed transcripts**

181 Transcripts only expressed in the given sample - were determined based on the count  
182 table data. For all 16 samples, 4 x 4 groups were determined to visualize the numerical  
183 differences between the expressed genes. The number of common and unique elements of  
184 sets are depicted on Venn diagrams (Figure 3). For better understanding grouping was based  
185 on the treatment complexity in the 0 and 2 days.

186 From the number of induced genes, results showed that on day 2, the level of gene expression  
187 was more significant in the treated samples, except for the ELICE16INDURES + BABA  
188 combination treatment, where the number of individually expressed genes decreased by the  
189 second day. Based on the control sample, on day 2, the SA stimulus-induced alterations in the  
190 expression of more than 1000 genes. This trend was also observed by BABA treatments.

191 Combined SA + BABA stimulus may cause a greater change in gene expression than alone.  
192 However, this phenomenon showed the opposite in the case of ELICE16INDURES. These  
193 samples showed a larger change without SA stimulus. Here, the number of unique transcripts  
194 stands out dramatically on day 2. Dual treatment caused fewer transcriptomic changes in each  
195 case than the treatments alone.

196

### 197 **Searching of sample differences by 2-norm**

198 We used this method to determine which treatment might cause the largest change in  
199 the number of differently expressed genes. Treatment (sample) combinations giving the  
200 greatest distances according to the 2-norm were examined. We focused on the outlier values,  
201 therefore larger values are marked in green and smaller values in red (Figure 4C). Pink  
202 indicates the top 10 combinations (which showed the most largest changes). Based on the  
203 distance values in the matrix we selected 2 x 3 samples, which was analyzed in pairwise  
204 analysis: (i) 1 vs 10 (ii) 1 vs 11; (iii) 1 vs 13; (iv) 1 vs 15; (v) 1 vs 16; and the outstanding (vi) 9 vs  
205 8 combinations. Taking into account the comparison of different effects of treatments alone  
206 and in combinations we grouped the pairs into two categories. The direct effect of  
207 ELICE16INDURES, BABA, and SA (i-iii) and combined effects of them (iv-vi). Pairwise differential  
208 expression analysis with the selected samples was performed. Based on this data the following  
209 conclusion might be performed: SA treatment caused the largest change among the  
210 investigated materials in the number of expressed genes. Combined treatment such as  
211 ELICE16INDURES + BABA + SA at 0 day in comparison with control at day 2 showed large  
212 changes in gene expression (8 vs 9). This combined effect was experienced also at day 2 such  
213 as ELICE16INDURES + BABA and ELICE16INDURES + BABA + SA in comparison with control and  
214 SA at day 0 (15 vs 1 and 16 vs 1). SA treatment might strongly affect the gene expression  
215 numerically just the day 0 and 2 day as well (10 vs 1, 10 vs 2, 15 vs 2, 16 vs 2). Functional  
216 analyzes to determining genes that might be in the background of numerical data were  
217 performed (Figure 4B).

218 Sample pairs highlighted with pink showed a high photosynthetic activity associated with  
219 chloroplast thylakoid membrane, light-harvesting of photosystems I and II, without exception.  
220 This phenomenon showed a strong gene expression measured between days 0 and 2. Selected  
221 pairs such as (i) 1 vs 10 (ii) 1 vs 11; (iii) 1 vs 13; (iv) 1 vs 15; (v) 1 vs 16; and the outstanding (vi)  
222 9 vs 8 combinations indicated also a strongly enhanced chloroplast activity. Since the



223 enhanced photosynthetic processes were suppressed the other valuable gene expression  
224 data, pairwise data was analyzed always on the given day of treatments (Figure 5).

225

### 226 **Determination of the most variable genes and their functions by 1-norm**

227 Based on distance values according to 1-norm analysis, the top 50 genes showing the  
228 most significant changes across 16 treatments were determined and filtered out. These genes  
229 showed the highest changes among the samples. An annotation table was assigned to these  
230 records. Based on GO terms, we determined biochemical processes that were affected by the  
231 top50 genes. The biological process and molecular function of involved genes are summarized  
232 in Figure 4A. The screening shows that the genes with the most change in the entire data set  
233 are also involved in the biochemistry of the jasmonic acid pathway, which was observed in  
234 field experiments as well. Interestingly, pathways responsible for photosynthesis also showed  
235 a large change as a result of the treatments, which are consistent with the NDVI studies. The  
236 listed oxidation-reduction system, as well as the cadmium ion response associated with  
237 oxidative stress, suggested that the antioxidant enzyme system was also stimulated in the  
238 samples, which is consistent with previous literature data for salicylic acid and BABA  
239 applications (Guo et al., 2013; Pastor et al., 2013). From this study, we determined which  
240 biological processes are most affected by the treatments. The up-and down-regulation of  
241 these processes was in focus in our further experiments such as the jasmonic acid pathway,  
242 (ii) photosynthesis, (iii) cellular respiration, and (iv) regulation of oxidative stress.

243

### 244 **Pairwise differential expression analysis**

245 To help the selection of sample pairs that were analyzed, we based these comparisons  
246 on the differences determined by the 2-norm. Top50 DEGs of the pairs of single treatments  
247 on days 0 and 2 were determined using enrichment analysis (Fisher's Exact Test). The DEGs  
248 were further performing GO analysis. The GO categories of over-expressed genes are  
249 illustrated using WordCloud based on GO IDs Fisher results (Figure 5A-F). These results  
250 indicated different mechanisms of action of the three investigated immune-priming agents. It  
251 can be seen that pathways of pathogen responses involved to priming are induced  
252 immediately after BABA addition which was associated with regulation of cellular redox  
253 homeostasis. Gene induction effect of BABA-priming decayed on day 2. In contrast, SA showed

254 a prolonged effect on priming genes such as response to external biotic stress to fungus and  
255 other organisms was induced strongly on day 2. Genes involved in this process showed high  
256 hydrolase, glucosidase, or chitinase activities as described earlier for example in rice by  
257 pathogen-derived elicitors and SA (Silverman et al., 1995). We found that ELICE16INDURES  
258 enhanced the photosynthesis just after addition, which effect was not observed analyzing SA  
259 and BABA treated samples. Enhanced photosynthesis may explain the higher NDVI data  
260 observed in field experiments. Mechanism of action of this agent during priming indicated a  
261 strong redox activity and high expression of DNA binding transcription factors. The  
262 transcription factor regulation through redox changes associated to plant pathogen defense  
263 mechanisms were observed for just about 25 years (Wu et al., 1997; Zhang et al., 1999; Dangl  
264 and Jones, 2001; Mou et al., 2003; Wendehenne et al., 2014).

265 Transcription regulatory activity corresponded to the high expression of TIFY domain  
266 proteins. Further analysis of the ELICE16INDURES application on day 2 was performed making  
267 a heatmap and determine the top50 DEGs (Supplemental Figure S2). In this investigation  
268 sample 9 (Control of day 2) and sample 13 (ELICE16INDURES of day 2) were set up as test and  
269 reference data sets. Gene set enrichment analysis of top50 DEGs obtained from heatmap and  
270 GO information are summarized in Supplemental Table S3. We found overexpression of genes  
271 of TIFY 3A (TRINITY\_DN489\_c0\_g1, TRINITY\_DN966\_c0\_g1), TIFY 9 (TRINITY\_DN354\_c0\_g1),  
272 TIFY 10A (TRINITY\_DN8954\_c0\_g1), TIFY 11B (TRINITY\_DN299\_c0\_g1) involving to JA  
273 response. *Arabidopsis* TIFY homologs, JAZ proteins act as negative regulators in JA signaling  
274 (Chini et al., 2007; Thines et al., 2007; Vanholme et al., 2007), and in response to JA and  
275 wounding TIFY domain proteins might be overexpressed. However, in cereal plants, TIFY  
276 mediated JA signal may work differently, hypothetically. In rice extensive up-regulation of  
277 OsTIFY10 and 11 members, moderated up-regulation of OsTIFY3 and OsTIFY9, and no change  
278 in the expression of OsTIFY1a and OsTIFY2a was observed in jasmonate associated growth.  
279 TIFY1a and TIFY2a were not differentially changed in our study as well. This was manifested  
280 by increased growth, grain weight, and flower number associated with shortened period to  
281 flowering. Since rice was not sensitive to external jasmonate addition, Hakata et al suggested  
282 that TIFY genes may promote growth by desensitizing plants to JA (Hakata et al., 2017). We  
283 observed yield increase in field conditions of ELICE16INDURES barley cultures corresponding  
284 to the findings of Hakata and al. Enhanced oxidoreductase activity suggested a strong effect

285 of oxidative stress regulation of ELICE16INDURES which was just predicted during field  
286 experiments. JA response was mediated primarily by serine-threonine protein kinase signal  
287 transduction pathways. This may indicate the mechanism of action of ELICE16INDURES might  
288 be associated with receptor signaling of Jasmonate-mediated plant responses.

289

### 290 **Determination of expression changes of genes of interest (GOIs)**

291 Responses to certain or multiple stress factors are a complex task of plants in which  
292 central regulatory hormones such as SA, JA, ethylene, and ABA play key roles. Since the  
293 defense mechanisms are complex regulation of these hormones overlapping and linked –  
294 positive and negative - regulation may be observed (Ahmed et al., 2013). Many natural-based  
295 elicitors may induce a primed state in plants regulating hormonal pathways and modulating  
296 antioxidant systems (Aranega-Bou et al., 2014). Taking into account these regulatory  
297 pathways we investigated the gene expression changes in samples 1-16 in phytotron  
298 experiments. Genes associated with SA, JA, ABA pathways, and redox-system were analyzed  
299 *in silico*. Validation of *in silico* gene expressions was performed by RT-qPCR analyses (Figure 6  
300 B-C).

301 In our study 20 genes (GOIs) and their interconnected regulation were investigated  
302 involving SA, JA, ABA and AOS genes. Functional analysis of extracted cds was performed  
303 before mapping GEx reads. These annotations such as GO terms and enzyme pathway analysis  
304 are summarized in Supplemental Table S4. PRD was calculated to analyze how much gene  
305 expressions changed relative to themselves. Synergistic and antagonistic effects of exogenous  
306 addition of priming-elicitors SA and BABA were investigated and compared with  
307 ELICE16INDURES hypothetical priming-active compound.

308

309 **Regulation of SA pathway genes.** The key SA regulators are ICS and PAL which enzymes may  
310 help plants in their protection against environmental stresses and are modulated by different  
311 abiotic, biotic stress factors and during defense processes (Wildermuth et al., 2001). SA  
312 application can positively regulate these enzymes - such as high expression and enhanced  
313 activity - during drought, salt, chilling, heat, heavy metal and UV-B radiation stresses (Khan et  
314 al., 2015). In barley under drought conditions overexpression of ICS was correlated with a  
315 higher activity of antioxidant enzymes and lower levels of reactive oxygen species (Wang et  
316 al., 2021). Application of SA enhanced the activity of CAT, peroxidases, SOD, APX, GR under

317 heavy metal stresses in different plant species (Arif et al., 2020). In our results, SA application  
318 upregulated ICS2 however repressed PAL by 20%. BABA and ELICE16INDURES treatments  
319 acted synergistically with exogenous SA addition to both genes. Correlation with GSH pathway  
320 and AOE genes were observed with exogenous SA application except for SOD that was  
321 repressed. Since during control conditions SOD was repressed as well, we supposed that SA  
322 treatment does not achieve its enhanced effect on the photosynthetic membrane and  
323 photosystem II activity involving the antioxidant system.

324 **Regulation of JA pathway genes.** Plant immunity especially involves JA biosynthesis and  
325 signaling in plant defenses against necrotrophic and insect infections (Brenya et al., 2020).  
326 During JA biosynthesis the chloroplast and the peroxisome are participating therefore  
327 lipoxygenase activity may play a key role in JA-induced priming. We detected enhanced LOX3  
328 activity in all treatments suggesting a positive effect on the JA pathway. A similar effect was  
329 proved in the case of Vitamin B2 (Azami-Sardooei et al., 2010; Taheri and Tarighi, 2010).  
330 Furthermore, high AOC up-regulation was detected by BABA that could act synergistically with  
331 SA and ELICE16INDURES. Contemporarily BABA represses OPR3 in opposite with SA and  
332 ELICE16INDURES. Since OPR3 catalysis dnOPDSA to OPC6 step in peroxisomes, this suggests  
333 the effect of BABA may be concentrated in chloroplast-joint scenarios or Beta-oxidation in  
334 peroxisomes (Ruan et al., 2019). BABA showed a high effect acting antagonistically on the  
335 other two investigated materials. Based on the results of field experiments TIFY11 and  
336 RHOMBOID-like protein 2 were also analyzed in these samples. Time course positive  
337 regulation of TIFY11 and RHOMBOID-like protein 2 genes were observed in phytotron  
338 experiments in correspondence with field investigations. This phenomenon was detected in  
339 the case of ELICE16INDURES and combined treatment with BABA. However single BABA and  
340 SA treatments didn't regulate these genes outstandingly. Transcriptional control of the JA  
341 pathway may be controlled by several factors (Caarls et al., 2015), therefore positive or  
342 negative gene regulation by different inducers is not surprising. Our results suggest that BABA  
343 and ELICE16INDURES induced outstanding changes in the JA-signaling, in contrast with SA  
344 which had less effect on these genes.

345 **Regulation of ABA pathway genes.** The accumulation of ABA is controlled by the enzyme 9-  
346 cis-epoxycarotenoid dioxygenase (NCED). Strong negative regulation of NCED1 by all  
347 treatments was found in this experiment. NCED1 was significantly down-regulated in drought  
348 stress, at which time ABA content reached a peak (Liu et al., 2016). However negative

349 regulation of NCED1 is unclear and little studied. Our results indicated that plant responses to  
350 the investigated immune-priming activators might be manifested in the negative feedback of  
351 NCED1.

352 **Regulation of GSH metabolism genes.** The expression of antioxidant enzyme genes under  
353 different stresses was tested in a few studies on barley (Harb et al., 2015) which detail that  
354 abiotic and biotic stresses strongly induces expression of these genes promoting  
355 detoxification. We investigated how these genes may be altered to exogenous metabolic  
356 enhancers which may be associated with priming. BABA, SA and ELICE16INDURES synergistic  
357 and antagonistic effects on the regulation of GSH pathway and AOS were therefore analyzed.  
358 In plants, glutathione (GSH) metabolism is a key part of AOS and stress management. It is  
359 required for efficient defense against plant pathogens. Many enzymes use GSH as an electron  
360 donor or as a substrate during sulfur assimilation, flower development, salicylic acid, and plant  
361 defense signaling. We investigated the PRD values of GSH pathway key genes such as  
362 ascorbate peroxidase (APX), dehydroascorbate reductase (DHAR), GSH peroxidase (GPX), GSH  
363 reductase (GR) and GSH synthase (GSS).

364 GSS is the second enzyme in the GSH biosynthesis pathway. It catalysis the condensation of  
365 gamma-glutamylcysteine and glycine, to form glutathione. In *A. thaliana* low levels of GSS  
366 have resulted in increased vulnerability to stressors such as heavy metals and toxic organic  
367 chemicals (Maksymiec et al., 2005). The presence of a thiol functional group allows its product  
368 GSH to serve both as an effective oxidizing and reducing agent in numerous biological  
369 scenarios (Saez et al., 1990). GSS was changed negatively only in the case of SA treatment,  
370 other treatments did not affect this gene.

371 In plants, GR catalyzes the reduction of GSH disulfide (GSSG) to the sulfhydryl form GSH, which  
372 is a critical molecule in resisting oxidative stress and maintaining the reducing environment of  
373 the cell. It is part of the glutathione-ascorbate cycle in which reduced GSH reduces  
374 dehydroascorbate, a reactive byproduct of the reduction of hydrogen peroxide. In particular,  
375 GR contributes to plants' response to abiotic stress. The activity of enzymes was modulated in  
376 response to metals, metalloids, salinity, drought, UV radiation, and heat-induced stress (Gill  
377 et al., 2013). A strong up-regulation in GR expression was detected after BABA treatment and  
378 down-regulation after SA treatment. Exogenous addition of SA and ELICE16INDURES may  
379 impair the BABA effect. However, the synergistic effect on GR up-regulation was observed in  
380 the case of SA + ELICE16INDURES combination.

381 GPXs enzyme family possesses nine stress-related genes with conserved domain and high  
382 homology in plant species. These enzymes reduce lipid hydroperoxides to their corresponding  
383 alcohols and reduce free hydrogen peroxide to water. GPXs are induced by oxidative stress  
384 (Khan et al., 2020) pathogen infections (Pieczul et al., 2020), mechanical stimulation (Singh et  
385 al., 2020), salt, cold, drought and metal treatments (Han et al., 2020).

386 DHAR regulates the cellular ascorbic acid redox state, which in turn affects cell responsiveness  
387 and tolerance to environmental ROS. DHAR is important for plant growth such as maintain  
388 steady-state chlorophyll and Rubisco (Chen and Gallie, 2006). Upregulation of GPX and DHAR  
389 was observed in all treatments except ELICE16INDURES.

390 APX is part of the ascorbate–glutathione cycle, which requires ascorbate to scavenge H<sub>2</sub>O<sub>2</sub>  
391 (Reddy et al., 2004; Sousa et al., 2015). APX was regulated negatively by ELICE16INDURES  
392 which effect may be slightly observed in the combined treatments (ELICE16INDURES + BABA  
393 + SA, ELICE16INDURES + BABA). A synergistic effect on the APX up-regulation was observed in  
394 BABA + SA combined treatment.

395 To summarize, GSH metabolism may be accelerated by the investigated priming-active  
396 substances, among which the most effective was the BABA treatment. This effect is  
397 outstanding in the case of GR. The other two substances show higher activity in combination  
398 suggesting synergistic effects.

399

#### 400 **Validation of enhanced expression of TIFY family members and RHOMBOID like protein 2**

401 The role of TIFY-motif proteins in JA signaling is known (Chung and Howe, 2009) however  
402 which stress factors may activate the TIFY-mediated events is less studied. In this study  
403 applying a comprehensive genome-wide bioinformatics analysis, we experienced that JA  
404 response was strongly associated with thylakoid membrane scenarios at the gene expression  
405 level. This phenomenon was remarkable triggering priming-associated genes by  
406 ELICE16INDURES. The expression profile performed by *in silico* predictions was validated by  
407 the RT-qPCR technique using plants cultivated in the phytotron. TIFY3A, TIFY9, TIFY10A,  
408 TIFY11B and RHOMBOID-like protein 2 showed a strong up-regulation after ELICE16INDURES  
409 treatment at day 2. Expression of these genes was observed after BABA and SA treatment at  
410 a significantly lower rate. TIFY3A was downregulated by SA. All substances triggered the  
411 relative expression of the RHOMBOID protein. Since rhomboid proteins are proved to be  
412 associated with the internal region of the thylakoid membrane we concluded that

413 ELICE16INDURES possess a priming effect through JA signaling. This hormonal regulation takes  
414 place in the chloroplast. Since we observed augmented photosynthetic areas in field  
415 experiments meaning an increased amount of chloroplasts in ELICE16INDURES treated plots,  
416 we concluded that higher gene levels of JA pathway genes (AOC, LOX, OPR1) correlated also  
417 with enhanced TIFY and Rhomboid proteins in phytotron experimental setup (Figure 6 A-C).  
418 The role of chloroplast-Rhomboid proteases was studied in *A. thaliana* indicating to have a  
419 positive impact on fertility and flowering through JA signaling (Adam, 2015)  
420 Plant immune response may be interconnected by various metabolic pathways, among which  
421 the most important is the photosynthetic activity from farming aspects. Alterations in  
422 physiological chloroplast events lead to plant wilting therefore understanding chloroplast  
423 function associated with priming is considerable. Since chloroplast is a major synthesis site for  
424 many plant hormones such as ABA, JA, SA, and free radical production, there is a complex  
425 relationship between photosynthesis and defense-related signals (Lu and Yao, 2018) which  
426 scenarios take place in thylakoid membranes, primarily. The rhomboid family of serine  
427 proteases plays a pivotal role in a diverse range of pathways, activating and releasing proteins  
428 via thylakoid intramembranous proteolysis. The plastid intramembranous proteolysis of  
429 RHOMBOIDS was studied in *A. thaliana* and found that the lack of chloroplast-located  
430 rhomboid proteases caused reduced fertility and aberrations in flower morphology which was  
431 interconnected to JA signaling (Adam, 2015).

432

## 433 **MATERIALS AND METHODS**

### 434 **Priming-active compounds**

435 ELICE16INDURES was produced in the Institute of Medicinal Plant and Herbs, Ltd, Hungary.  
436 We used the high-pressure extraction with supercritical carbon dioxide as a solvent (scCO<sub>2</sub>  
437 extraction). 11 scCO<sub>2</sub> extracts of medicinal plants were establishes in a common set of states  
438 and encapsulated in sunflower lecithin based liposomes (Figure 1 D). The ratio of scCO<sub>2</sub>  
439 extracts see in Figure 1B. We reach to entrap the active agents into small multilamellar vesicles  
440 (MLV) of 250-350 nm by using active trapping techniques (Mayer et al., 1986). Transmission  
441 electron microscopy (TEM) was used to characterize the sizes and structures of liposomes in  
442 the range 10-1000 nm. Liposome structures were visualized and analyzed by TEM (Figure 1).  
443 Active compounds of ELICE16INDURES are summarized in Supplemental Table S5. scCO<sub>2</sub>  
444 extracts were purchased from FLAVEX Natureextrakte GmbH, Germany. The two immune

445 priming activator compounds SA and BABA (purity 99 and 97%) were purchased from Merck  
446 (MilliporeSigma, US).

447

#### 448 **TEM processing and particle size analysis**

449 Samples for transmission electron microscopy (TEM) were prepared by diluting liposome  
450 concentrates with MQ water and depositing a drop of the suspension on copper TEM grids  
451 covered by continuous carbon amorphous support film. After 5 minutes the drop was blotted  
452 with filter paper. Diluted (2%) phosphotungstic acid was used for sample staining. The staining  
453 time was 30 seconds. Measurement conditions were as follows: TEM analyses were  
454 performed using a Talos F200X G2 instrument (Thermo Fisher), operated at 200 kV  
455 accelerating voltage, equipped with a field-emission gun and a 4096x4096 CMOS camera for  
456 imaging. In our study TEM bright-field images were collected at 36000x magnification for  
457 particle size analysis and other magnifications as well to visualize the details and the inner  
458 structures of the liposomes.

459 Particle size analysis was performed based on TEM bright-field images using Gimp and ImageJ  
460 software. The Gimp software was used for image processing (including contrast enhancement,  
461 blurring, and manual outlining) and ImageJ was used for creating the final image with  
462 grayscale threshold settings and for an analysis of particle sizes. The smaller particles had  
463 continuous borders and sufficient contrast for distinguishing them from their background with  
464 proper threshold settings, enabling ImageJ to recognize these particles. We could not use this  
465 method directly on the larger particles because of their diffuse details or discontinuous  
466 borders. Therefore, we manually outlined and filled the larger particles with black color to  
467 create an image with white background and black particles. As the last step, we removed the  
468 black pixels forming bridges between the particles to create the final image for the particle  
469 size analysis.

470

#### 471 **Cultivation of plant materials and chemical treatment**

472 Fresh leaves were collected on days 0 and 2 after treatments from 11-16-day-old autumn  
473 barley plants (diploid). Day 0 means 2-3 hours after treatment. Plants were cultivated in  
474 phytotron and arable fields.

475 **Phytotron experiments.** Exogenous treatment of SA, BABA, and ELICE16INDURES was  
476 performed in phytotron experiments. Plant growth chamber type was MLR352HPA -115V



477 NEMA 5-20, 220V / 60Hz – Panasonic. Treatment conditions were as follows: temperature  
478 during the 1. day and night was 25 °C. The temperature during the 2-16. days and nights were  
479 25 °C and 15 °C. Duration of the day was 12 hours, 04-4 p.m. Treatments were as follows: Na-  
480 SA (MW: 160.11 g/mol), 300 µM- solution; BABA (MW: 103.121 g/mol), final concentration in  
481 soil was 25 µM; ELICE16INDURES, 1 ml/100ml water. Experimental design and sample  
482 collection were performed according to Figure 3A and B.

483 **Field experiments.** Plants in field experiments were sprayed by TTAM4E drone with low and  
484 high doses of ELICE16INDURES. We used a positive control that was a commercially available  
485 plant conditioner, Fitokondi®. Applied doses and plot allocations were: 1, control without  
486 treatment; 2, positive control treated with Fitokondi; 3, 10 g/ha; 4, 20 g/ha; 5, 30 g/ha; 6, 60  
487 g/ha; 7, 120 g/ha ; 8, 240 g/ha ELICE16INDURES. Plot allocation of doses see in Figure 2A. After  
488 sample collections, samples were prepared for RNA-sequencing and gene expression profiling.  
489 Three biological repeats were investigated.

490

#### 491 **Determination of normalized difference vegetation index (NDVI) by remote sensing**

492 To monitor NDVI in the field population we used a DJI-phantom 4 agro drone equipped with  
493 a near-infrared camera. The recording was carried out on day 2 after treatment. Single aerial  
494 pictures were combined afterward with AgiSoft Photoscan Professional software using high-  
495 quality dense cloud processing and mesh construction settings (Figure 2A). To NDVI  
496 calculation after identifying the plots based on combined aerial photographs, sample areas  
497 were cut out using self-developed software. Sample collection for molecular biological  
498 analysis was performed at the same day.

499

#### 500 **Preparation of RNA-seq libraries**

501 Approximately 30 mg of plant tissues were placed in a 1.5 ml Eppendorf LoBind tube  
502 containing glass beads (1.7-2.1 mm diameter, Carl Roth, Karlsruhe, Germany) and 100 µl of  
503 TRI-Reagent (Zymo Research). The Eppendorf tube was firmly attached to a SILAMAT S5  
504 vibrator (Ivoclar Vivadent, Schaan, Liechtenstein) to disrupt and homogenize the tissue for  
505 2x15s. Total RNA was extracted using Direct-zol™ RNA MiniPrep System (Zymo Research)  
506 according to the manufacturer's protocol. The RNA Integrity Numbers and RNA concentration  
507 were determined by RNA ScreenTape system with 2200 TapeStation (Agilent Technologies,  
508 Santa Clara, CA, USA) and RNA HS Assay Kit with Qubit 3.0 Fluorometer (Thermo Fisher

509 Scientific, Waltham, MA, USA), respectively. For Gene Expression Profiling (GEx) library  
510 construction, QuantSeq 3' mRNA-Seq Library Prep Kit FWD for Illumina (Lexogen GmbH, Wien,  
511 Austria) was applied according to the manufacturer's protocol. The quality and quantity of the  
512 library were determined by using High Sensitivity DNA1000 ScreenTape system with 2200  
513 TapeStation (Agilent Technologies, Santa Clara, CA, USA) and dsDNA HS Assay Kit with Qubit  
514 3.0 Fluorometer (Thermo Fisher Scientific, Waltham, MA, USA), respectively. Pooled libraries  
515 were diluted to 1.8 pM for 1x86 bp single-end sequencing with 75-cycle High Output v2 Kit on  
516 the NextSeq 550 Sequencing System (Illumina, San Diego, CA, USA) according to the  
517 manufacturer's protocol. By using longer reads QuantSeq FWD allows to exactly pinpoint the  
518 3' end of poly(A) RNA and therefore obtain accurate information about the 3' UTR. Using this  
519 sequencing fragments of coding sequences are 260-300 bp long on average.

520

#### 521 **Bioinformatics analysis – reads processing**

522 3 x 16 libraries were sequenced with a final output single-end, 15-18 M x 80 bases long.  
523 Quality control (QC), trimming, and filtering of .fastq files were performed in preprocessing  
524 step. The QC analysis was performed with FastQC (Andrews et al., 2010) software. For all the  
525 3 x 16 libraries the Phred-like quality scores (Qscores) were set to >30. Poor quality reads,  
526 adapters at the ends of reads, limited skewing at the ends of reads were eliminated by using  
527 Trimmomatic (Bolger et al., 2014). Contamination sequences and N's were filtered out with a  
528 self-developed application GenoUtils as described earlier (Mátyás et al., 2019): reads  
529 containing N's more than 30 % were eliminated; reads with lower N' ratio were trimmed with  
530 a final length > 65. Reads passed of preprocessing were further assembled and analyzed.

531

#### 532 ***De novo* assembly and mapping**

533 Reference transcript dataset was firstly created from the libraries (TrinityH16-transcript,  
534 Supplemental File S1). To increase the coverage of the transcripts *de novo* assembly was  
535 performed with all the cleaned reads of combined 3 x 16 libraries. To obtain longer mRNA  
536 fragments from the combined short reads (65-80bp) without reference Trinity assembler with  
537 23K-mer were used (Grabherr et al., 2011). For *de novo* assembly and mapping we used a  
538 server with 512 GB (Gigabytes) of RAM, 64 cores (CPUs), and Ubuntu as the operating system.  
539 To assess the read composition of the assembly, input RNA-Seq reads were aligned to the  
540 transcriptome assembly using Bowtie2 (Langmead and Salzberg, 2012). All reads from each

541 biological repeat (3 x 16) were separately mapped against the reference dataset. Reads  
542 mapped to the assembled transcript were captured. Statistic of mapped reads was performed  
543 and compared between all replicates. We used TrinityH16-transcript for gene expression  
544 profiling. Collapsing of splicing isoforms were performed with OmicsBox and SuperTranscripts  
545 (gene-level assembly) were used in further investigations TrinityH16-supertranscript,  
546 Supplemental Data Set S2. Trinity H-field (Supplemental Data Set S6) transcript dataset of filed  
547 experiments were performed with the same method.

548

#### 549 **Gene level quantification**

550 To estimate gene expression from RNA-sequencing CountTable was created (Supplemental  
551 Data Set S3). To count how many reads map to each feature of interest (transcripts) each  
552 sample reads were aligned to the reference TrinityH16-supertranscript. Count Table creation  
553 was performed with omibox.biobam (OmicsBox, <https://www.biobam.com/omicsbox>) using  
554 the HTseq package (Anders et al., 2015). Based on the data of CountTable further analyses  
555 were performed such as differential expression analysis and mathematical prediction of the  
556 test area.

557

#### 558 **Pairwise differential expression analysis**

559 Numerical analysis of differentially expressed genes (DEGs) in a pairwise comparison of two  
560 different experimental conditions - *gene expression analysis* – was carried out using  
561 omibox.biobam (OmicsBox, <https://www.biobam.com/omicsbox>). The used application is  
562 based on the edgeR program implementing quantitative statistical methods to evaluate the  
563 significance of individual genes between two experimental conditions (Robinson et al., 2010).  
564 TMM (Weighted trimmed mean of M-values) normalization method was performed.

565

#### 566 **Functional annotation**

567 Functional annotation and Gene Ontology (GO) analysis were carried out using  
568 OmixBox.Biobam as follows: 1. Sequences were blasted against NCBI nr (non-redundant)  
569 Viridiplantae database (downloaded in 2019) applying blastn configuration locally; 2. To  
570 retrieving GO terms associated with the 10 Hits obtained by the Blast search GO mapping and  
571 annotation were performed. GeneBank identifiers (gi), the primary blast Hit ids, were used to  
572 retrieve UniProt IDs making use of a mapping file from PIR (Non-redundant Reference Protein

573 Database) including PSD, UniProt, Swiss-Prot, TrEMBL, RefSeq, GenPept and PDB. Accessions  
574 were searched directly in the dbxref table of the GO database. BLAST result accessions were  
575 searched directly in the gene-product table of the GO database; 3. GO annotations were  
576 specified according to GO terms: molecular function, cellular component, biological process.

577

#### 578 **Determination of uniquely expressed transcripts**

579 Count table data of each biological replicates were used. According to the mapping statistics,  
580 there were no significant differences between the biological replicates. Average values of  
581 counts were taken into account used to create a 60,615 (number of genes, rows) x 16 (number  
582 of samples, column) matrix from the count table. Normalization of mapped read counts, RPM  
583 index (reads per million mapped reads, Figure 7A) were firstly calculated from matrix data for  
584 the determination of uniquely expressed transcripts and mathematical modeling of interest  
585 area (see below). Highly characteristic transcripts that were uniquely expressed were filtered  
586 out from the matrix with Microsoft access database manager. Identifiers of these transcripts  
587 in each treatment condition (sample) were separated and saved in txt files. To the better  
588 evaluation graphical representation of results was grouped into 4 Venn diagrams (Figure 3 C-  
589 F) using the web-based interactivenn.net (Heberle et al., 2015).

590

#### 591 **Enrichment analysis**

592 To determine cellular responses and cell-biochemical processes altered between 2 samples  
593 and how they are affected by the treatments, Fisher's Exact Test was used. Fisher's Exact Test  
594 performs functional analysis of differential expressed genes working with the entire  
595 annotated data set previously determined (Huang et al., 2009).

596

#### 597 **Mathematical prediction of investigated area examination**

598 To predict which treatment conditions show the most different transcriptomic events, search  
599 and determination the extremal points of the 16 transcriptome data sets as a  
600 multidimensional space. The 60,615 x 16 matrix was analyzed by column and by rows which  
601 fields contained the RPM indexes.

602

#### 603 **Searching of sample differences by 2-norm**

604 2-norm is a functional on vector space that assigns a non-negative (real) number to the  
605 elements of vector space. Hölder norms (e.g., 1-norm, 2-norm, p-norm) can be used to  
606 manage distances (length) in abstract spaces. In our case, we took a 60,615-dimensional  
607 vector space (with its 16 vectors, Figure 7C), in which the column vectors were spaced. We  
608 wondered how far apart these vectors in pairs are. Since the distance function is commutative,  
609 therefore in a given comparison, only the two different vectors were counted, their order was  
610 not. The examination number was given by a combination of 16 elements without second  
611 class repetition which is  $16 * 15/2$ . The distance of 2 columns was given by the value of the  
612 vector of the difference between the two vectors according to norm 2 (Figure 7 B, C).

613

#### 614 **Searching of differences between genes by 1-norm**

615 During this method transcripts showing the largest changes in RPM across the 16 samples  
616 were determined. For this analysis, all 60,615 transcripts were involved. For each transcripts,  
617 absolute values of the difference in RPM values between the sample pairs were calculated  
618 and these values were summarized. We assumed that higher values are stronger in  
619 expression. As a result of the analysis, the top 50 genes were determined (Figure 7D).

620

#### 621 **Determination of the most variable cell-biochemical pathways**

622 The top 50 transcripts based on distance values by 1-norm were categorized according to GO  
623 terms. Cell biochemical processes were examined in more detail. Changes in cell responses as  
624 a result of treatment were grouped based on enrichment analysis (Huang et al., 2009).

625

#### 626 **Determination of expression changes of genes of interest (GOIs)**

627 We identified the accurate coding sequences (cds) of investigated pathway genes in our plant  
628 material. Therefore we used a transcriptome dataset from deep sequencing of three, treated  
629 and control phytotron samples of *H. vulgare* (TrinityH-Deep, Supplemental Data Set S4).  
630 Sequencing protocol and assembly were used as described earlier (Virág et al., 2016). We  
631 identified cds of 20 genes of interest (Supplemental Data Set S5). JA, ABA, SA and GSH pathway  
632 genes were determined. Contigs of these genes were identified based on *Oriza sativa* and *H.*  
633 *vulgare* using BLASTn with an E value less than  $10^{-5}$  (Altschul et al., 1990). ORF (open reading  
634 frame) was determined with NCBI ORF finder. These cds were used as reference sequences to  
635 mapping reads of GEx libraries to determine gene expression changes. Time course RPM

636 changes (PRD, percentage of relative difference) as a response to treatments were calculated  
637 (formula see in Figure 7E). Expression changes were calculated mapping reads of QuantSeq 3'  
638 mRNA-Seq libraries in which one fragment per transcript was produced, therefore, no length  
639 normalization was required. This method allows a more accurate determination of expression  
640 values in gene expression studies.

641

#### 642 **Gene expression analysis with RT-qPCR amplification**

643 RT-qPCR experiment of GOIs was performed as described earlier (Mátyás et al., 2019). Primers  
644 were designed with Primer3 (Koressaar and Remm, 2007; Untergasser et al., 2012) based on  
645 *in silico* sequences of GEx libraries. Gene expression analysis was established based on three  
646 technical and biological replicates and normalized with the reference gene glyceraldehyde-3-  
647 phosphate dehydrogenase, *GAPDH*.

648

#### 649 **Accession Numbers**

650 Raw reads of this project used for field and phytotron experiments (21 SRA experiments) are  
651 deposited in the NCBI SRA database under the accessions: Bioproject, PRJNA721578; Deep  
652 RNA sequencing, SRX10603947- SRX10603949; Sequencing of field experiments,  
653 SRX10598683, SRX10598684; Sequencing of phytotron experiments, SRX10600133-  
654 SRX10600148.

655

#### 656 **Supplemental data**

657 **Supplemental Table S1** Annotation of most interesting genes from the top50 DEGs in field  
658 experiments.

659 **Supplemental Table S2** Results of functional annotation of TrinityH16-supertranscript –  
660 reference- transcript dataset.

661 **Supplemental Table S3** Annotation of top50 DEGs of pairwise comparison

662 **Supplemental Table S4** Gene ontology and enzyme annotation of investigated sequences of  
663 SA, JA, ABA and GSH pathway genes.

664 **Supplemental Table S5** Biologically active components of ELICE16INDURES.

665 **Supplemental Figure S1** The top20 GO term categories of the reference transcriptome

666 **Supplemental Figure S2** Heatmap of the investigated 16 *H. vulgare* samples

667 **Supplemental Data Set S1** TrinityH16-transcript.fasta

668 **Supplemental Data Set S2** TrinityH16-supertranscript.fasta

669 **Supplemental Data Set S3** Count Table

670 **Supplemental Data Set S4** TrinityH-Deep

671 **Supplemental Data Set S5** Coding sequences and primers GOIs

672

### 673 **ACKNOWLEDGMENTS**

674 The work was supported by the KFI\_16-1-2017-0457 - *Development and production of a plant-*  
675 *based pesticide-plant conditioner for use in organic farming* - project of the Hungarian  
676 Government. We express our thanks to the Xenovea Ltd, Hungary to perform NGS library  
677 preparation and sequencing. We are grateful to the editor and reviewers for the valuable  
678 comments that have helped to improve the manuscript.

679

680 **AUTHOR CONTRIBUTIONS:** E.V., and J.P.P., designed the project; G.H., M.K., B.L., L.G., Á.N.,  
681 P.P., Z.T., performed experiments; K.D., B.K., K. S., E.V., and G.H., analyzed the data., E.V., and  
682 G.H., performed bioinformatics analyses., E.V., and Á.J., wrote the paper.

683

684 **Competing interests:** Authors declare no competing interests.

685 **REFERENCES**

686

687 **Abdel-Aziz, H., Hasaneen, M., and Omer, A.** (2019). Impact of engineered nanomaterials either alone  
688 or loaded with NPK on growth and productivity of French bean plants: Seed priming vs foliar  
689 application. *South African Journal of Botany* **125**, 102-108.

690 **Adam, Z.** (2015). Plastid intramembrane proteolysis. *Biochimica et Biophysica Acta (BBA)-*  
691 *Bioenergetics* **1847**, 910-914.

692 **Adeniyi, S., Orjiekwe, C., Ehiagbonare, J., and Arimah, B.** (2010). Preliminary phytochemical analysis  
693 and insecticidal activity of ethanolic extracts of four tropical plants (*Vernonia amygdalina*, *Sida*  
694 *acuta*, *Ocimum gratissimum* and *Telfaria occidentalis*) against beans weevil (*Acanthscelides*  
695 *obtectus*). *International Journal of Physical Sciences* **5**, 753-762.

696 **Ahmed, I.M., Cao, F., Zhang, M., Chen, X., Zhang, G., and Wu, F.** (2013). Difference in yield and  
697 physiological features in response to drought and salinity combined stress during anthesis in  
698 Tibetan wild and cultivated barleys. *PloS one* **8**, e77869.

699 **Altschul, S.F., Gish, W., Miller, W., Myers, E.W., and Lipman, D.J.** (1990). Basic local alignment search  
700 tool. *Journal of molecular biology* **215**, 403-410.

701 **Anders, S., Pyl, P.T., and Huber, W.** (2015). HTSeq—a Python framework to work with high-throughput  
702 sequencing data. *bioinformatics* **31**, 166-169.

703 **Andrews, S., Krueger, F., Seconda-Pichon, A., Biggins, F., and Wingett, S.** (2010). FastQC: a quality  
704 control tool for high throughput sequence data. *Babraham Bioinformatics*. 2010.

705 **Aranega-Bou, P., de la O Leyva, M., Finiti, I., García-Agustín, P., and González-Bosch, C.** (2014).  
706 Priming of plant resistance by natural compounds. Hexanoic acid as a model. *Frontiers in plant*  
707 *science* **5**, 488.

708 **Arif, Y., Sami, F., Siddiqui, H., Bajguz, A., and Hayat, S.** (2020). Salicylic acid in relation to other  
709 phytohormones in plant: a study towards physiology and signal transduction under challenging  
710 environment. *Environmental and Experimental Botany*, 104040.

711 **Azami-Sardoei, Z., França, S.C., De Vleeschauwer, D., and Höfte, M.** (2010). Riboflavin induces  
712 resistance against *Botrytis cinerea* in bean, but not in tomato, by priming for a hydrogen  
713 peroxide-fueled resistance response. *Physiological and Molecular Plant Pathology* **75**, 23-29.

714 **Beckers, G.J., and Conrath, U.** (2007). Priming for stress resistance: from the lab to the field. *Current*  
715 *opinion in plant biology* **10**, 425-431.

716 **Bolger, A.M., Lohse, M., and Usadel, B.** (2014). Trimmomatic: a flexible trimmer for Illumina sequence  
717 data. *Bioinformatics* **30**, 2114-2120.

718 **Brenya, E., Chen, Z.-H., Tissue, D., Papanicolaou, A., and Cazzonelli, C.I.** (2020). Prior exposure of  
719 *Arabidopsis* seedlings to mechanical stress heightens jasmonic acid-mediated defense against  
720 necrotrophic pathogens. *BMC Plant Biology* **20**, 1-16.

721 **Burketova, L., Trda, L., Ott, P.G., and Valentova, O.** (2015). Bio-based resistance inducers for  
722 sustainable plant protection against pathogens. *Biotechnology advances* **33**, 994-1004.

723 **Caarls, L., Pieterse, C.M., and Van Wees, S.** (2015). How salicylic acid takes transcriptional control over  
724 jasmonic acid signaling. *Frontiers in plant science* **6**, 170.

725 **Calvo, P., Nelson, L., and Kloepper, J.W.** (2014). Agricultural uses of plant biostimulants. *Plant and soil*  
726 **383**, 3-41.

727 **Chen, Z., and Gallie, D.R.** (2006). Dehydroascorbate reductase affects leaf growth, development, and  
728 function. *Plant Physiology* **142**, 775-787.

729 **Chini, A., Fonseca, S., Fernandez, G., Adie, B., Chico, J., Lorenzo, O., García-Casado, G., López-**  
730 **Vidriero, I., Lozano, F., and Ponce, M.** (2007). The JAZ family of repressors is the missing link  
731 in jasmonate signalling. *Nature* **448**, 666-671.

732 **Chung, H.S., and Howe, G.A.** (2009). A critical role for the TIFY motif in repression of jasmonate  
733 signaling by a stabilized splice variant of the JASMONATE ZIM-domain protein JAZ10 in  
734 *Arabidopsis*. *The Plant Cell* **21**, 131-145.



- 735 **Dangl, J.L., and Jones, J.D.** (2001). Plant pathogens and integrated defence responses to infection.  
736 *nature* **411**, 826-833.
- 737 **Divya, B., Suman, B., Venkataswamy, M., and Thyagaraju, K.** (2017). A study on phytochemicals,  
738 functional groups and mineral composition of *Allium sativum* (garlic) cloves. *International*  
739 *Journal of Current Pharmaceutical Research* **9**, 42-45.
- 740 **Du Jardin, P.** (2015). Plant biostimulants: definition, concept, main categories and regulation. *Scientia*  
741 *Horticulturae* **196**, 3-14.
- 742 **Dutta, P.** (2018). Seed priming: new vistas and contemporary perspectives. In *Advances in seed priming*  
743 (Springer), pp. 3-22.
- 744 **Farooq, M., Usman, M., Nadeem, F., ur Rehman, H., Wahid, A., Basra, S.M., and Siddique, K.H.** (2019).  
745 Seed priming in field crops: potential benefits, adoption and challenges. *Crop and Pasture*  
746 *Science* **70**, 731-771.
- 747 **Figueiredo, A., Monteiro, F., and Sebastiana, M.** (2015). First clues on a jasmonic acid role in grapevine  
748 resistance against the biotrophic fungus *Plasmopara viticola*. *European Journal of Plant*  
749 *Pathology* **142**, 645-652.
- 750 **Geelen, D., and Xu, L.** (2020). *The Chemical Biology of Plant Biostimulants*. (John Wiley & Sons,  
751 Incorporated).
- 752 **Gill, S.S., Anjum, N.A., Hasanuzzaman, M., Gill, R., Trivedi, D.K., Ahmad, I., Pereira, E., and Tuteja, N.**  
753 (2013). Glutathione and glutathione reductase: a boon in disguise for plant abiotic stress  
754 defense operations. *Plant Physiology and Biochemistry* **70**, 204-212.
- 755 **Grabherr, M.G., Haas, B.J., Yassour, M., Levin, J.Z., Thompson, D.A., Amit, I., Adiconis, X., Fan, L.,**  
756 **Raychowdhury, R., and Zeng, Q.** (2011). Trinity: reconstructing a full-length transcriptome  
757 without a genome from RNA-Seq data. *Nature biotechnology* **29**, 644.
- 758 **Guo, Q., Meng, L., Mao, P.-C., Jia, Y.-Q., and Shi, Y.-J.** (2013). Role of exogenous salicylic acid in  
759 alleviating cadmium-induced toxicity in Kentucky bluegrass. *Biochemical Systematics and*  
760 *Ecology* **50**, 269-276.
- 761 **Hakata, M., Muramatsu, M., Nakamura, H., Hara, N., Kishimoto, M., Iida-Okada, K., Kajikawa, M.,**  
762 **Imai-Toki, N., Toki, S., and Nagamura, Y.** (2017). Overexpression of TIFY genes promotes plant  
763 growth in rice through jasmonate signaling. *Bioscience, biotechnology, and biochemistry* **81**,  
764 906-913.
- 765 **Han, L.-m., Hua, W.-p., Cao, X.-y., Yan, J.-a., Chen, C., and Wang, Z.-z.** (2020). Genome-wide  
766 identification and expression analysis of the superoxide dismutase (SOD) gene family in *Salvia*  
767 *miltiorrhiza*. *Gene* **742**, 144603.
- 768 **Harb, A., Awad, D., and Samarah, N.** (2015). Gene expression and activity of antioxidant enzymes in  
769 barley (*Hordeum vulgare* L.) under controlled severe drought. *Journal of Plant Interactions* **10**,  
770 109-116.
- 771 **Heberle, H., Meirelles, G.V., da Silva, F.R., Telles, G.P., and Minghim, R.** (2015). InteractiVenn: a web-  
772 based tool for the analysis of sets through Venn diagrams. *BMC bioinformatics* **16**, 1-7.
- 773 **Huang, D.W., Sherman, B.T., and Lempicki, R.A.** (2009). Bioinformatics enrichment tools: paths  
774 toward the comprehensive functional analysis of large gene lists. *Nucleic acids research* **37**, 1-  
775 13.
- 776 **Kalbi, S., Fallah, A., and Shataee, S.** (2014). Estimation of forest attributes in the Hyrcanian forests,  
777 comparison of advanced space-borne thermal emission and reflection radiometer and satellite  
778 pour l'observation de la terre-high resolution grounding data by multiple linear, and  
779 classification and regression tree regression models. *Journal of Applied Remote Sensing* **8**,  
780 083632.
- 781 **Kanaoka, M.M., Urban, S., Freeman, M., and Okada, K.** (2005). An Arabidopsis Rhomboid homolog is  
782 an intramembrane protease in plants. *FEBS letters* **579**, 5723-5728.
- 783 **Karny, A., Zinger, A., Kajal, A., Shainsky-Roitman, J., and Schroeder, A.** (2018). Therapeutic  
784 nanoparticles penetrate leaves and deliver nutrients to agricultural crops. *Scientific Reports* **8**,  
785 1-10.

- 786 **Khan, A., Numan, M., Khan, A.L., Lee, I.-J., Imran, M., Asaf, S., and Al-Harrasi, A.** (2020). Melatonin:  
787 Awakening the defense mechanisms during plant oxidative stress. *Plants* **9**, 407.
- 788 **Khan, M.I.R., Fatma, M., Per, T.S., Anjum, N.A., and Khan, N.A.** (2015). Salicylic acid-induced abiotic  
789 stress tolerance and underlying mechanisms in plants. *Frontiers in plant science* **6**, 462.
- 790 **Klokić, I., Koleška, I., Hasanagić, D., Murtić, S., Bosančić, B., and Todorović, V.** (2020). Biostimulants'  
791 influence on tomato fruit characteristics at conventional and low-input NPK regime. *Acta*  
792 *Agriculturae Scandinavica, Section B—Soil & Plant Science* **70**, 233-240.
- 793 **Knopf, R.R., Feder, A., Mayer, K., Lin, A., Rozenberg, M., Schaller, A., and Adam, Z.** (2012). Rhomboid  
794 proteins in the chloroplast envelope affect the level of allene oxide synthase in *Arabidopsis*  
795 *thaliana*. *The Plant Journal* **72**, 559-571.
- 796 **Koressaar, T., and Remm, M.** (2007). Enhancements and modifications of primer design program  
797 Primer3. *Bioinformatics* **23**, 1289-1291.
- 798 **Langmead, B., and Salzberg, S.L.** (2012). Fast gapped-read alignment with Bowtie 2. *Nature methods*  
799 **9**, 357.
- 800 **Latif, S., Gurusinghe, S., Weston, P.A., Quinn, J.C., Piltz, J.W., and Weston, L.A.** (2020). Metabolomic  
801 approaches for the identification of flavonoids associated with weed suppression in selected  
802 Hardseeded annual pasture legumes. *Plant and Soil* **447**, 199-218.
- 803 **Liu, S., Li, M., Su, L., Ge, K., Li, L., Li, X., Liu, X., and Li, L.** (2016). Negative feedback regulation of ABA  
804 biosynthesis in peanut (*Arachis hypogaea*): a transcription factor complex inhibits AhNCED1  
805 expression during water stress. *Scientific reports* **6**, 1-11.
- 806 **Lu, Y., and Yao, J.** (2018). Chloroplasts at the crossroad of photosynthesis, pathogen infection and  
807 plant defense. *International journal of molecular sciences* **19**, 3900.
- 808 **Maksymiec, W., Wianowska, D., Dawidowicz, A.L., Radkiewicz, S., Mardarowicz, M., and Krupa, Z.**  
809 (2005). The level of jasmonic acid in *Arabidopsis thaliana* and *Phaseolus coccineus* plants under  
810 heavy metal stress. *Journal of plant physiology* **162**, 1338-1346.
- 811 **Mátyás, K.K., Hegedűs, G., Taller, J., Farkas, E., Decsi, K., Kutasy, B., Kálmán, N., Nagy, E., Kolics, B.,**  
812 **and Virág, E.** (2019). Different expression pattern of flowering pathway genes contribute to  
813 male or female organ development during floral transition in the monoecious weed *Ambrosia*  
814 *artemisiifolia* L.(Asteraceae). *PeerJ* **7**, e7421.
- 815 **Mayer, L.D., Bally, M.B., Hope, M.J., and Cullis, P.R.** (1986). Techniques for encapsulating bioactive  
816 agents into liposomes. *Chemistry and physics of lipids* **40**, 333-345.
- 817 **Moses, T., Papadopoulou, K.K., and Osbourn, A.** (2014). Metabolic and functional diversity of  
818 saponins, biosynthetic intermediates and semi-synthetic derivatives. *Critical reviews in*  
819 *biochemistry and molecular biology* **49**, 439-462.
- 820 **Mou, Z., Fan, W., and Dong, X.** (2003). Inducers of plant systemic acquired resistance regulate NPR1  
821 function through redox changes. *Cell* **113**, 935-944.
- 822 **Mujeeb, F., Bajpai, P., and Pathak, N.** (2014). Phytochemical evaluation, antimicrobial activity, and  
823 determination of bioactive components from leaves of *Aegle marmelos*. *BioMed research*  
824 *international* **2014**.
- 825 **Narwal, S.** (2006). Allelopathy in ecological sustainable agriculture. In *Allelopathy* (Springer), pp. 537-  
826 564.
- 827 **Narwal, S.S.** (2012). *Allelopathy in crop production.* (Scientific publishers).
- 828 **Noutoshi, Y., Okazaki, M., Kida, T., Nishina, Y., Morishita, Y., Ogawa, T., Suzuki, H., Shibata, D.,**  
829 **Jikumaru, Y., and Hanada, A.** (2012). Novel plant immune-priming compounds identified via  
830 high-throughput chemical screening target salicylic acid glucosyltransferases in *Arabidopsis*.  
831 *The Plant Cell* **24**, 3795-3804.
- 832 **Olusanmi, M., and Amadi, J.** (2010). Studies on the antimicrobial properties and phytochemical  
833 screening of garlic (*Allium sativum*) extracts. *Ethnobotanical leaflets* **2009**, 10.
- 834 **Parađiković, N., Teklić, T., Zeljković, S., Lisjak, M., and Špoljarević, M.** (2019). Biostimulants research  
835 in some horticultural plant species—A review. *Food and Energy Security* **8**, e00162.

- 836 **Pastor, V., Luna, E., Ton, J., Cerezo, M., García-Agustín, P., and Flors, V.** (2013). Fine tuning of reactive  
837 oxygen species homeostasis regulates primed immune responses in Arabidopsis. *Molecular*  
838 *plant-microbe interactions* **26**, 1334-1344.
- 839 **Pieczul, K., Dobrzycka, A., Wolko, J., Perek, A., Zielezińska, M., Bocianowski, J., and Rybus-Zajac, M.**  
840 (2020). The activity of  $\beta$ -glucosidase and guaiacol peroxidase in different genotypes of winter  
841 oilseed rape (*Brassica napus* L.) infected by *Alternaria* black spot fungi. *Acta Physiologiae*  
842 *Plantarum* **42**, 1-9.
- 843 **Prabha, D., Negi, S., Kumari, P., Negi, Y.K., and Chauhan, J.** (2016). Effect of seed priming with some  
844 plant leaf extract on seedling growth characteristics and root rot disease in tomato.  
845 *International Journal of Agriculture System* **4**, 46-51.
- 846 **Reddy, A.R., Chaitanya, K., Jutur, P., and Sumithra, K.** (2004). Differential antioxidative responses to  
847 water stress among five mulberry (*Morus alba* L.) cultivars. *Environmental and experimental*  
848 *botany* **52**, 33-42.
- 849 **Robinson, M.D., McCarthy, D.J., and Smyth, G.K.** (2010). edgeR: a Bioconductor package for  
850 differential expression analysis of digital gene expression data. *Bioinformatics* **26**, 139-140.
- 851 **Ruan, J., Zhou, Y., Zhou, M., Yan, J., Khurshid, M., Weng, W., Cheng, J., and Zhang, K.** (2019). Jasmonic  
852 acid signaling pathway in plants. *International journal of molecular sciences* **20**, 2479.
- 853 **Saez, G., Bannister, W., and Bannister, J.** (1990). Free radicals and thiol compounds. The role of  
854 glutathione against free radical toxicity. (Boca Raton FL: CRC Press Inc).
- 855 **Satish, S., Mohana, D., Ranhavendra, M., and Raveesha, K.** (2007). Antifungal activity of some plant  
856 extracts against important seed borne pathogens of *Aspergillus* sp. *Journal of Agricultural*  
857 *technology* **3**, 109-119.
- 858 **Schwessinger, B., and Ronald, P.C.** (2012). Plant innate immunity: perception of conserved microbial  
859 signatures. *Annual review of plant biology* **63**, 451-482.
- 860 **Sharma, H.S., Fleming, C., Selby, C., Rao, J., and Martin, T.** (2014). Plant biostimulants: a review on  
861 the processing of macroalgae and use of extracts for crop management to reduce abiotic and  
862 biotic stresses. *Journal of applied phycology* **26**, 465-490.
- 863 **Silverman, P., Seskar, M., Kanter, D., Schweizer, P., Metraux, J.-P., and Raskin, I.** (1995). Salicylic acid  
864 in rice (biosynthesis, conjugation, and possible role). *Plant physiology* **108**, 633-639.
- 865 **Singh, S., Kumar, V., Kapoor, D., Kumar, S., Singh, S., Dhanjal, D.S., Datta, S., Samuel, J., Dey, P., and**  
866 **Wang, S.** (2020). Revealing on hydrogen sulfide and nitric oxide signals co-ordination for plant  
867 growth under stress conditions. *Physiologia Plantarum* **168**, 301-317.
- 868 **Sousa, R.H., Carvalho, F.E., Ribeiro, C.W., Passaia, G., Cunha, J.R., LIMA-MELO, Y., MARGIS-PINHEIRO,**  
869 **M., and Silveira, J.A.** (2015). Peroxisomal APX knockdown triggers antioxidant mechanisms  
870 favourable for coping with high photorespiratory H<sub>2</sub>O<sub>2</sub> induced by CAT deficiency in rice.  
871 *Plant, cell & environment* **38**, 499-513.
- 872 **Špoljarević, M., Štolfa, I., Lisjak, M., Stanisavljević, A., Vinković, T., Agić, D., Parađiković, N., Teklić,**  
873 **T., Engler, M., and Klešić, K.** (2010). Strawberry (*Fragaria x ananassa* Duch) leaf antioxidative  
874 response to biostimulators and reduced fertilization with N and K. *Poljoprivreda* **16**, 50-56.
- 875 **Taheri, P., and Tarighi, S.** (2010). Riboflavin induces resistance in rice against *Rhizoctonia solani* via  
876 jasmonate-mediated priming of phenylpropanoid pathway. *Journal of plant physiology* **167**,  
877 201-208.
- 878 **Thines, B., Katsir, L., Melotto, M., Niu, Y., Mandaokar, A., Liu, G., Nomura, K., He, S.Y., Howe, G.A.,**  
879 **and Browse, J.** (2007). JAZ repressor proteins are targets of the SCF COI1 complex during  
880 jasmonate signalling. *Nature* **448**, 661-665.
- 881 **Toscano, S., Romano, D., Massa, D., Bulgari, R., Franzoni, G., and Ferrante, A.** (2018). Biostimulant  
882 applications in low input horticultural cultivation systems= I biostimolanti nei sistemi colturali  
883 ortofloricoli a basso impatto ambientale.
- 884 **Ugena, L., Hýlová, A., Podlešáková, K., Humplík, J.F., Doležal, K., Diego, N.D., and Spíchal, L.** (2018).  
885 Characterization of biostimulant mode of action using novel multi-trait high-throughput  
886 screening of *Arabidopsis* germination and rosette growth. *Frontiers in plant science* **9**, 1327.

- 887 **Untergasser, A., Cutcutache, I., Koressaar, T., Ye, J., Faircloth, B.C., Remm, M., and Rozen, S.G.** (2012).  
888 Primer3—new capabilities and interfaces. *Nucleic acids research* **40**, e115-e115.
- 889 **Vanholme, B., Grunewald, W., Bateman, A., Kohchi, T., and Gheysen, G.** (2007). The tify family  
890 previously known as ZIM. *Trends in plant science* **12**, 239-244.
- 891 **Vargas-Hernandez, M., Macias-Bobadilla, I., Guevara-Gonzalez, R.G., Romero-Gomez, S.d.J., Rico-**  
892 **Garcia, E., Ocampo-Velazquez, R.V., Alvarez-Arquieta, L.d.L., and Torres-Pacheco, I.** (2017).  
893 Plant hormesis management with biostimulants of biotic origin in agriculture. *Frontiers in plant*  
894 *science* **8**, 1762.
- 895 **Virág, E., Hegedús, G., Barta, E., Nagy, E., Mátyás, K., Kolics, B., and Taller, J.** (2016). Illumina  
896 sequencing of common (short) ragweed (*Ambrosia artemisiifolia* L.) reproductive organs and  
897 leaves. *Frontiers in plant science* **7**, 1506.
- 898 **Walters, D.R., Newton, A.C., and Lyon, G.D.** (2014). Induced resistance for plant defense: a sustainable  
899 approach to crop protection. (John Wiley & Sons).
- 900 **Wang, W., Zhang, G., Yang, S., Zhang, J., Deng, Y., Qi, J., Wu, J., Fu, D., Wang, W., and Hao, Q.** (2021).  
901 Overexpression of isochorismate synthase enhances drought tolerance in barley. *Journal of*  
902 *Plant Physiology*, 153404.
- 903 **Wendehenne, D., Gao, Q.-m., Kachroo, A., and Kachroo, P.** (2014). Free radical-mediated systemic  
904 immunity in plants. *Current opinion in plant biology* **20**, 127-134.
- 905 **Wildermuth, M.C., Dewdney, J., Wu, G., and Ausubel, F.M.** (2001). Isochorismate synthase is required  
906 to synthesize salicylic acid for plant defence. *Nature* **414**, 562-565.
- 907 **Wu, G., Shortt, B.J., Lawrence, E.B., Leon, J., Fitzsimmons, K.C., Levine, E.B., Raskin, I., and Shah, D.M.**  
908 (1997). Activation of host defense mechanisms by elevated production of H<sub>2</sub>O<sub>2</sub> in transgenic  
909 plants. *Plant Physiology* **115**, 427-435.
- 910 **Zhang, Y., Fan, W., Kinkema, M., Li, X., and Dong, X.** (1999). Interaction of NPR1 with basic leucine  
911 zipper protein transcription factors that bind sequences required for salicylic acid induction of  
912 the PR-1 gene. *Proceedings of the National Academy of Sciences* **96**, 6523-6528.
- 913 **Dangl, J.L., and Jones, J.D.** (2001). Plant pathogens and integrated defence responses to  
914 infection. *nature* **411**, 826-833.
- 915 **Mou, Z., Fan, W., and Dong, X.** (2003). Inducers of plant systemic acquired resistance regulate  
916 NPR1 function through redox changes. *Cell* **113**, 935-944.
- 917 **Wendehenne, D., Gao, Q.-m., Kachroo, A., and Kachroo, P.** (2014). Free radical-mediated  
918 systemic immunity in plants. *Current opinion in plant biology* **20**, 127-134.
- 919 **Wu, G., Shortt, B.J., Lawrence, E.B., Leon, J., Fitzsimmons, K.C., Levine, E.B., Raskin, I., and**  
920 **Shah, D.M.** (1997). Activation of host defense mechanisms by elevated production of  
921 H<sub>2</sub>O<sub>2</sub> in transgenic plants. *Plant Physiology* **115**, 427-435.
- 922 **Zhang, Y., Fan, W., Kinkema, M., Li, X., and Dong, X.** (1999). Interaction of NPR1 with basic  
923 leucine zipper protein transcription factors that bind sequences required for salicylic  
924 acid induction of the PR-1 gene. *Proceedings of the National Academy of Sciences* **96**,  
925 6523-6528.
- 926 **Vanholme, B., Grunewald, W., Bateman, A., Kohchi, T., and Gheysen, G.** (2007). The tify  
927 family previously known as ZIM. *Trends in plant science* **12**, 239-244.
- 928 **Chini, A., Fonseca, S., Fernandez, G., Adie, B., Chico, J., Lorenzo, O., García-Casado, G., López-**  
929 **Vidriero, I., Lozano, F., and Ponce, M.** (2007). The JAZ family of repressors is the  
930 missing link in jasmonate signalling. *Nature* **448**, 666-671.
- 931 **Thines, B., Katsir, L., Melotto, M., Niu, Y., Mandaokar, A., Liu, G., Nomura, K., He, S.Y., Howe,**  
932 **G.A., and Browse, J.** (2007). JAZ repressor proteins are targets of the SCF COI1 complex  
933 during jasmonate signalling. *Nature* **448**, 661-665.
- 934  
935

## Figures

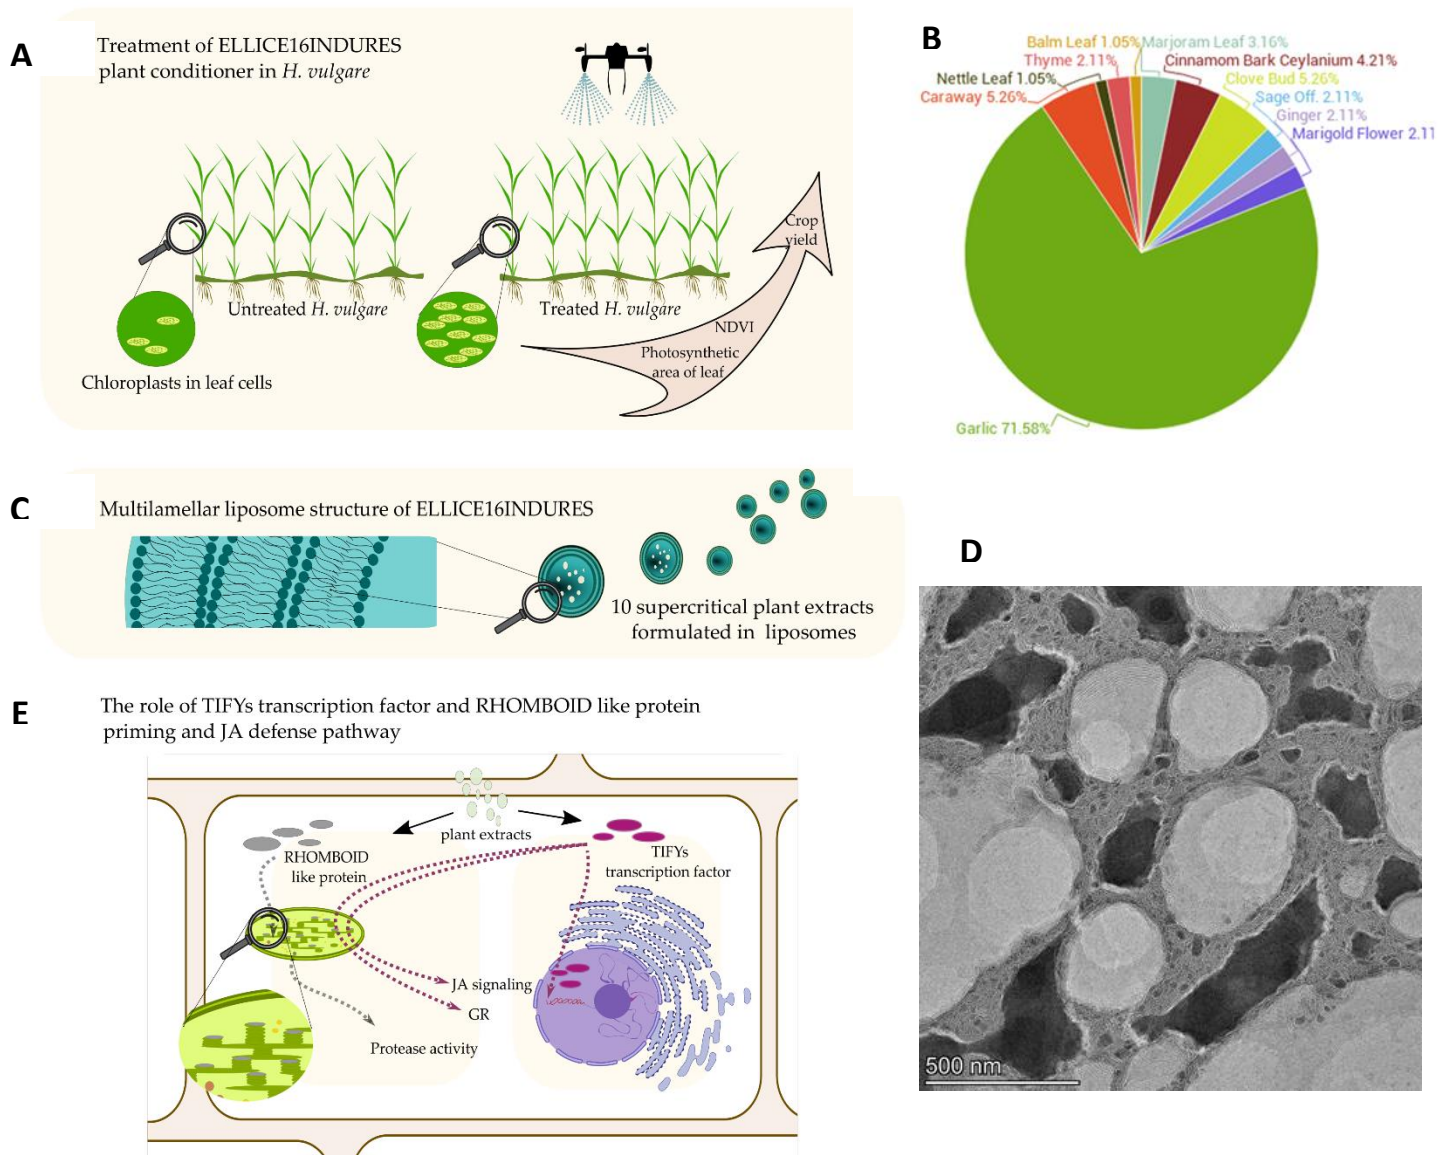

**Figure 1. Summary of ELICE16INDURES® structure and mode of action**

Field treatment of ELICE16INDURES plant conditioner with drone spraying (**A**). Higher chloroplast and photosynthetic activities were monitored by NDVI calculation. The main component of ELICE16INDURES is the garlic CO<sub>2</sub> extract which ratio is more than 70% in the liposomes (**B**). Multilamellar small liposome structures (**C**, **D**) helps the delivery of the priming active material complex to the plant cell. According to transcriptomic profiling, TIFY domain proteins and RHOMBOID-like proteins are induced and lead to augmented protease, glutathione reductase activity, and Jasmonate signaling (**E**).

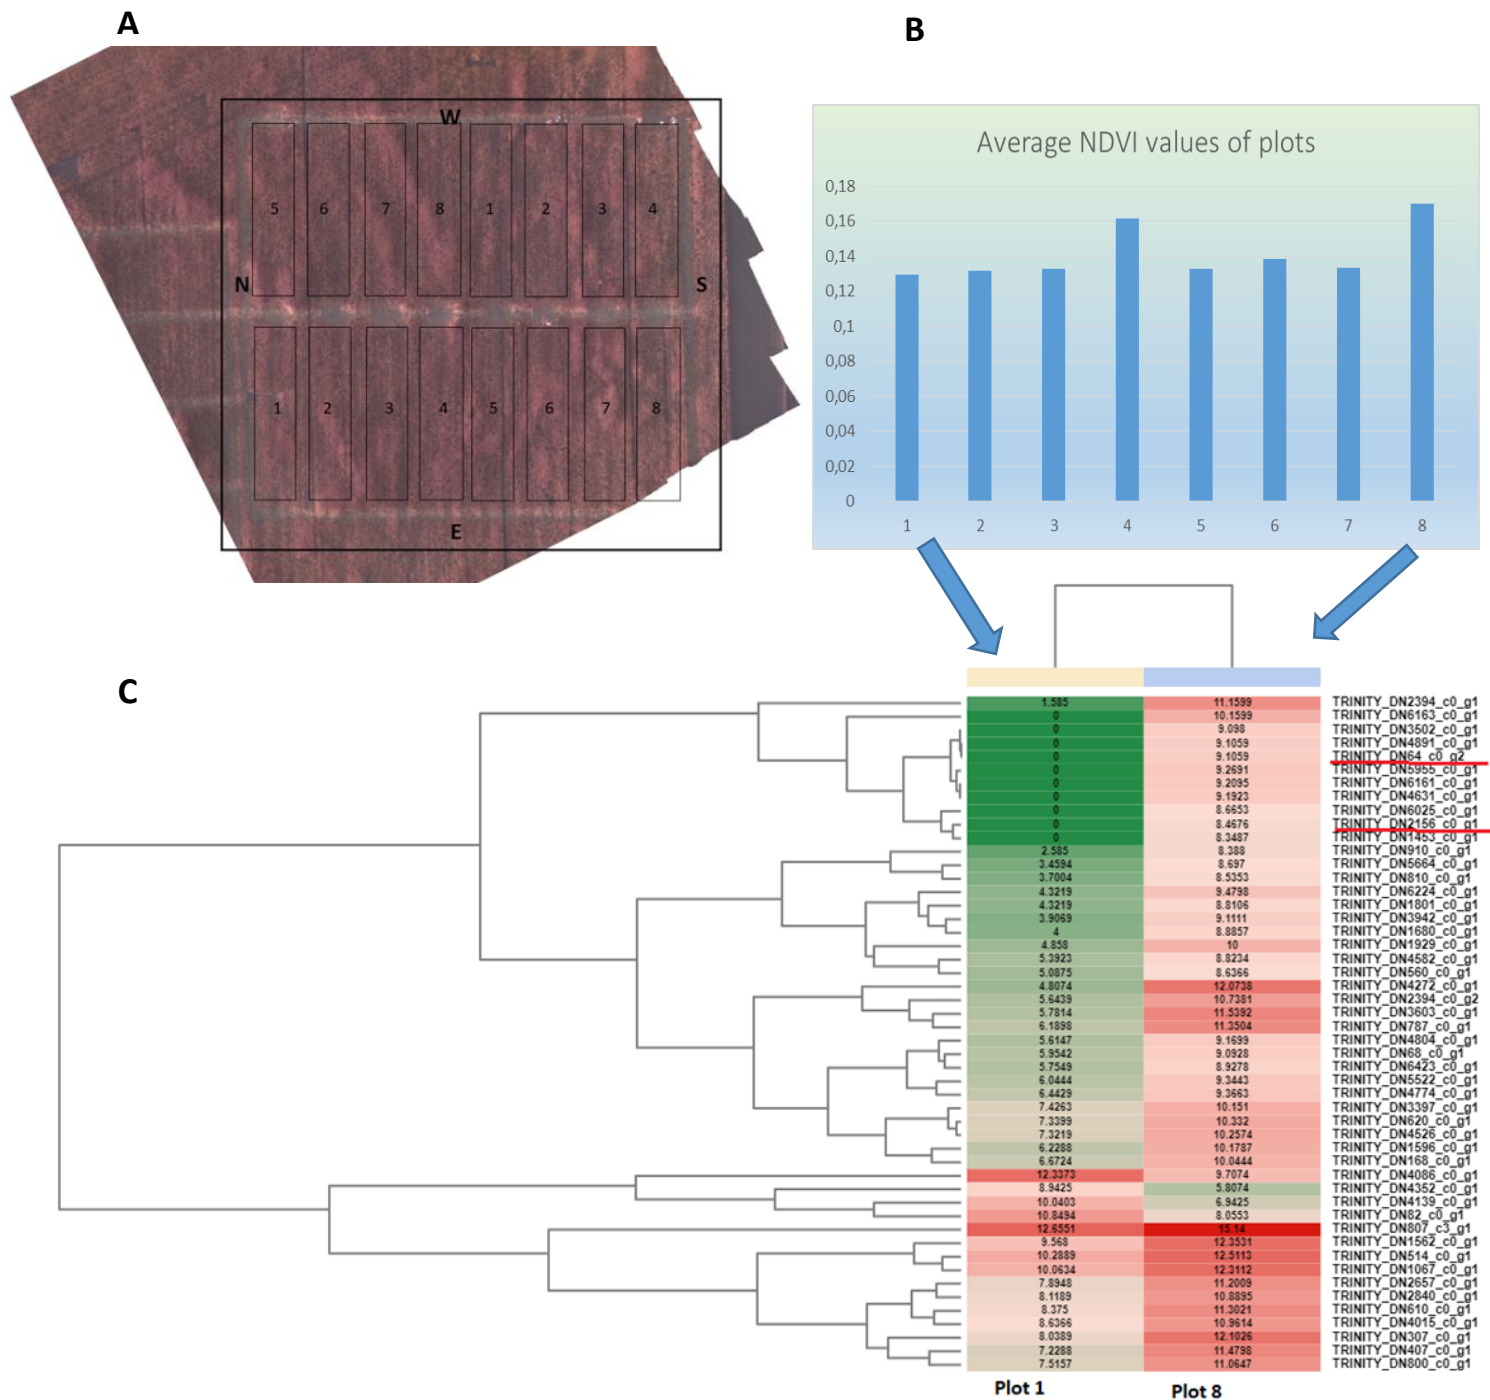

## 9 Figure 2. Field experiments of ELICE16INDURES® on autumn barley cultures

9 Plots and doses of ELICE16INDURES® applied in field experiments: **1**, control without treatment; **2**, positive control treated with Fitokondi®; **3**, 10 g/ha; **4**, 20 g/ha; **5**, 30 g/ha; **6**, 60 g/ha; **7**, 120 g/ha; **8**, 240 g/ha ELICE16INDURES®. Experimental areas are visualized by a combined photograph from drone photos (**A**). A near-infrared camera was used to calculate NDVI from each pixel. The average NDVI of plots calculated from pixel values is visualized on figure (**B**). Heatmap of top 50 DEGs of *H. vulgare* treated by ELICE16INDURES® in the field (**C**). Samples were collected randomly from the plot **8** and **1**. Genes highlighted with red are involved in JA-pathway: TRINITY\_DN64\_c0\_g2, protein TIFY 11e-like and TRINITY\_DN2156\_c0\_g1, RHOMBOID-like protein 2. Annotation of heat map see in Supplemental Table S2.

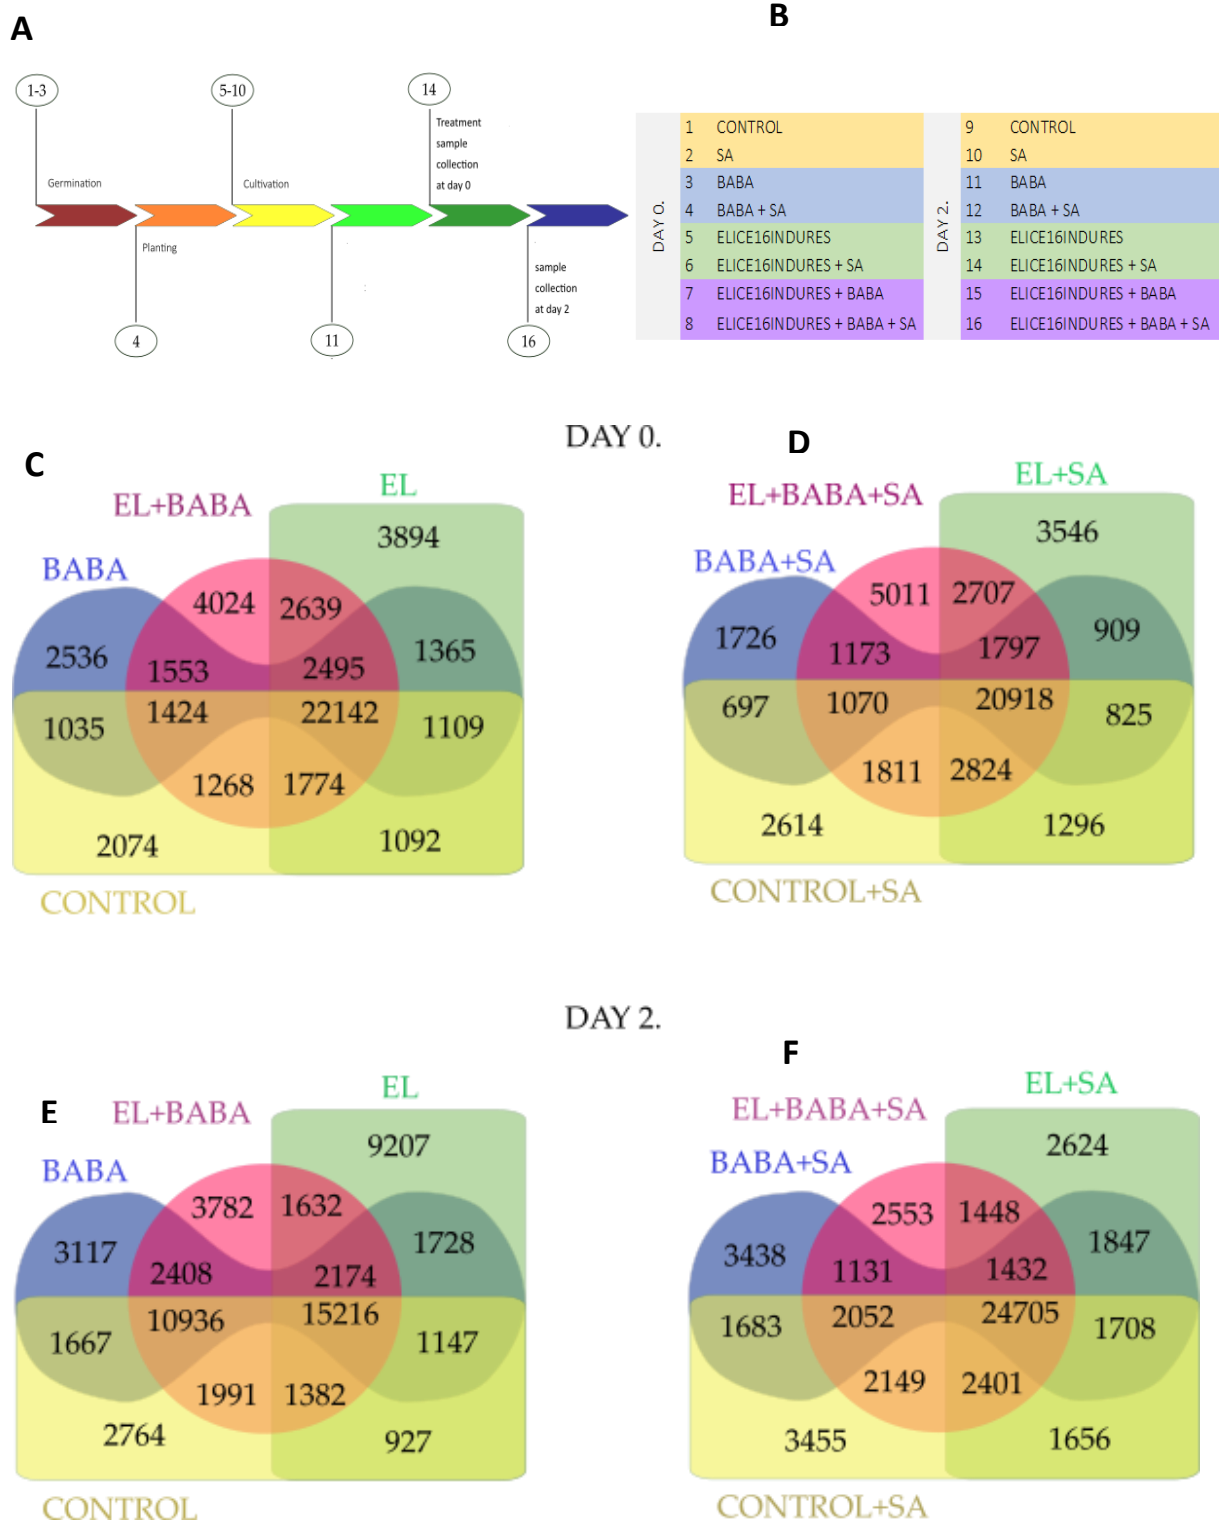

**Figure 3. Venn diagrams. Numerical analysis of individually and commonly expressed genes in *H. vulgare* treated by priming-active materials.**

Experimental design of phytotron experiments **A** and **B**. Abbreviations: EL, ELICE16INDURES; SA, salicylic acid; BABA, beta-amino butyric acid. Treatments of priming inducing agents were performed on day 14. Sample collections were performed at day 14 (**Day 0**) at day 16 (**Day 2**).

Samples were collected at day 0 (**C, D**) and 2 (**E, F**) after treatments. Control samples were not treated, these were cultivated under the same conditions as the treated samples. For all 16 samples, 4 x 4 groups were determined to visualize the numerical differences between the expressed genes. **C** and **E** diagrams compare numerically the genes expressed in the case of EL and BABA treatments and their combinations. **D** and **F** diagrams compare numerically the genes expressed between the treatments EL and BABA supplemented with SA.

A

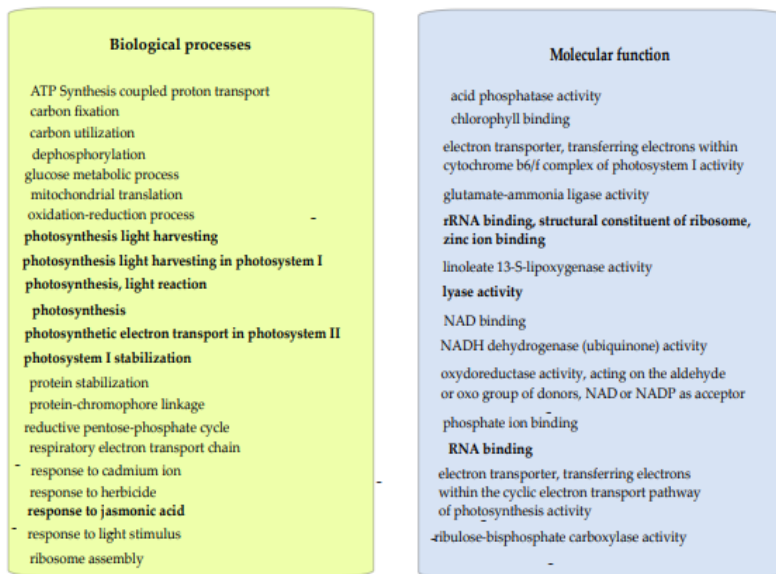

**Figure 4. Searching of sample differences by 2-norm and determination of most variable genes by 1-norm**

Cell biochemical processes and molecular function of the top50 gene showing the largest change in the total data set of 16 samples determined by 1-norm are visualized (A).

Column combinations (16 x 15/2) in sample difference searching process by 2-norm (C). Numbers means the treatments according to experimental design. Pink-colored values are the top 10 sample combinations with the highest expression differences. Columns showing the greatest differences for the total transcriptomic data may determine which two samples had the largest difference in gene expression at the total gene level; namely which 2 samples have the most different transcriptomic pattern. Values indicate the distances between the samples. A higher value means more different patterns. Sample pairs selected based on the table were used to perform pairwise gene expression analysis. To better understanding, a WordCloud (B) of gene set enrichment analysis of sample pairs screened with 2-norm was performed. Words mean GO categories of pink-colored values that were highlighted in (C).

B

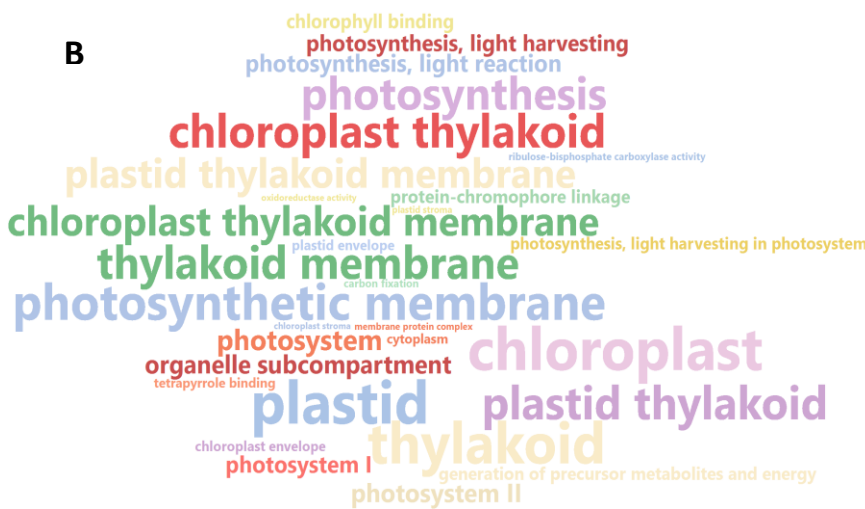

C

|    | 1 | 2        | 3        | 4        | 5        | 6        | 7        | 8        | 9        | 10       | 11       | 12       | 13       | 14       | 15       | 16       |
|----|---|----------|----------|----------|----------|----------|----------|----------|----------|----------|----------|----------|----------|----------|----------|----------|
| 1  |   | 15063,52 | 19009,75 | 38650,36 | 52863,75 | 40330,02 | 31661,76 | 31177,43 | 107752,2 | 89594,25 | 64914,28 | 40226,72 | 51883,36 | 71400,96 | 95612,85 | 96149,21 |
| 2  |   |          | 31506,78 | 50710,08 | 62574,11 | 49011,43 | 40095,36 | 37282,8  | 118005,2 | 100568,9 | 76678,51 | 50037,57 | 62920,75 | 82629,32 | 107234,6 | 107845,7 |
| 3  |   |          |          | 25272,27 | 41347,17 | 32317,08 | 24770,74 | 28070,78 | 94596,91 | 75443,84 | 50044,72 | 29458,06 | 39113,25 | 57600,95 | 80617,14 | 81140,68 |
| 4  |   |          |          |          | 28341,85 | 24550,29 | 25548,67 | 31930,51 | 76470,02 | 57639,57 | 34325,73 | 24130,76 | 28148,54 | 42550,75 | 63898,69 | 64347,78 |
| 5  |   |          |          |          |          | 16932,28 | 23278,19 | 28451,62 | 56816,72 | 39522,95 | 28122,53 | 21593,88 | 16618,2  | 26134,2  | 49287,61 | 50133,2  |
| 6  |   |          |          |          |          |          | 11690,21 | 15522,43 | 70009,04 | 53842,17 | 39207,4  | 19219,68 | 23535,98 | 38610,34 | 63390,46 | 64025,41 |
| 7  |   |          |          |          |          |          |          | 8151,309 | 78701,92 | 61568,97 | 43025,94 | 18301,39 | 26747,37 | 44878,23 | 69876,37 | 70502,49 |
| 8  |   |          |          |          |          |          |          |          | 83086,85 | 66631,66 | 48946,62 | 22576,7  | 32142,63 | 50035,71 | 75170,71 | 75865,54 |
| 9  |   |          |          |          |          |          |          |          |          | 25022,9  | 57778,21 | 74485,15 | 61942,81 | 44899,72 | 35973,68 | 36498,77 |
| 10 |   |          |          |          |          |          |          |          |          |          | 34338,84 | 53916,91 | 40874,33 | 23422,35 | 18190,64 | 19174,26 |
| 11 |   |          |          |          |          |          |          |          |          |          |          | 29320,09 | 20405,68 | 19708,35 | 34947,49 | 35009,78 |
| 12 |   |          |          |          |          |          |          |          |          |          |          |          | 16307,11 | 35102,16 | 59028,7  | 59575,59 |
| 13 |   |          |          |          |          |          |          |          |          |          |          |          |          | 20665,23 | 45657,67 | 45942,37 |
| 14 |   |          |          |          |          |          |          |          |          |          |          |          |          |          | 27422,6  | 26878,37 |
| 15 |   |          |          |          |          |          |          |          |          |          |          |          |          |          |          | 6883,931 |
| 16 |   |          |          |          |          |          |          |          |          |          |          |          |          |          |          |          |



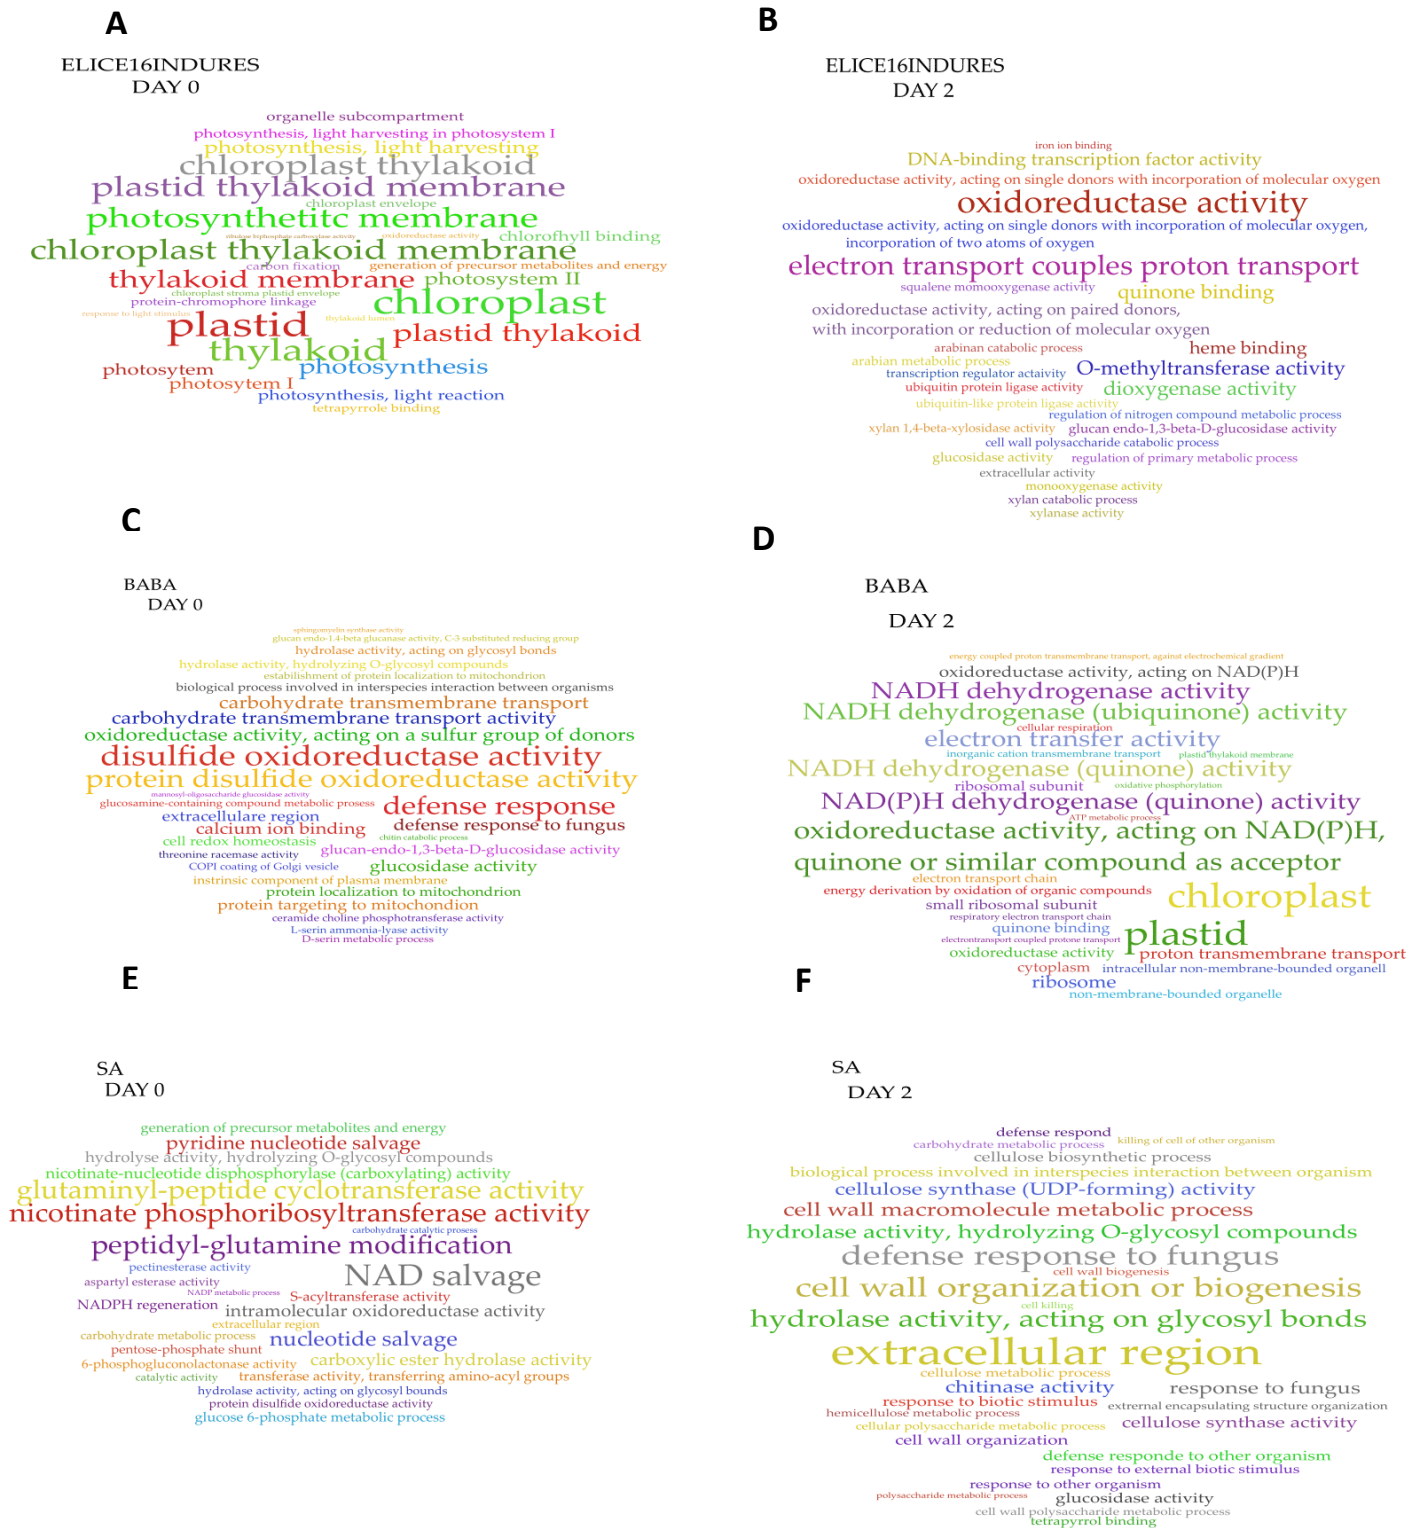

**Figure 5. Functional annotation of pairwise differential expression of treatments**

WordCloud representation of GO enrichment analysis of sample pairs. ELICE16INDURES vs Control (**A, B**), BABA vs Control (**C, D**) and SA vs Control (**E, F**) were compared in time course at the days 0 and 2 and presented in the pairwise Clouds. ELICE16INDURES enhanced the photosynthesis just after addition, which effect was not observed analyzing SA

944 **A** 945

| Pathway | Enzyme   | control | SA      | BABA    | GOIs PRD |         |         |         |            |
|---------|----------|---------|---------|---------|----------|---------|---------|---------|------------|
|         |          |         |         |         | BABA+SA  | AL      | AL+SA   | AL+BABA | AL+BABA+SA |
| SA      | ICS 2    | -45,902 | 21,2571 | 66,0767 | 66,5356  | 126,055 | 111,331 | 67,1239 | 170,117366 |
|         | PAL      | 34,4533 | -21,236 | 512,28  | 148,088  | 20,8041 | 52,5232 | 39,5341 | 24,8926893 |
| JA      | AOC      | 561,764 | 83,7334 | 235,493 | 1183,95  | 173,431 | 457,846 | 1239,62 | 489,911488 |
|         | LOX3     | -54,88  | 78,7676 | 160,03  | 168,807  | 139,252 | 111,981 | 306,974 | 83,2939266 |
|         | OPR1     | -100    | 25,1373 | -46,812 | 0        | 287,361 | 278,538 | 612,205 | -49,436158 |
|         | TIFY11   | 98,0124 | 6,77732 | 12,7932 | 6,54732  | 1366    | 127,976 | 138,989 | 665,999    |
|         | RHOMBOID | 8,79389 | 9,6754  | 8,63345 | 19,4522  | 789,134 | 44,765  | 66,974  | 67,9983    |
| ABA     | ALDO2    | -7,7131 | -22,945 | -8,8206 | 287,398  | 39,9708 | 58,986  | 96,4704 | 133,283179 |
|         | NCED1    | -14,367 | -20,991 | -18,999 | -9,8872  | -79,928 | -59,28  | -68,402 | -46,316538 |
|         | ZEP1     | 254,517 | 317,124 | 134,027 | 54,9593  | -100    | 66,5568 | 149,734 | 76,9734464 |
| GSH     | APX      | 41,2231 | 26,7731 | 245,003 | 344,013  | -18,631 | 147,616 | 104,759 | -8,2359908 |
|         | DHAR     | 30,0989 | 79,3916 | 283,352 | 132,911  | 22,2558 | 124,728 | 153,357 | 118,288169 |
|         | GPX4     | -0,6876 | 39,1707 | 32,1396 | -1,7503  | 51,7776 | 54,3554 | 67,0673 | 75,8533613 |
|         | GSS      | 0       | 0       | 0       | 0        | 0       | -100    | 0       | 0          |
|         | GR       | 64,1972 | -5,3583 | 1548,83 | 1504,94  | 184,824 | 557,142 | 699,414 | 165,46017  |
| AOE     | SOD      | -100    | -67,497 | -57,45  | 21,7538  | 36,7157 | 178,226 | 186,732 | -87,933629 |
|         | CAT      | -5,4622 | 13,7612 | 126,935 |          | 219,003 | 217,972 | 485,026 | 241,305932 |

**Figure 6. Validation analysis of genes of interest (GOI): ABA, JA, SA pathway-related genes, GR, TIFY-domain, and Rhomboid proteins.**

PRD values of genes (A). Time course RPM changes as the response of treatments. Since expression intensity of each investigated gene showed high variances - in accordance with their physiological necessities - under control conditions, RPM deviation over days 0. and 2. were determined and expressed in %. Abbreviations: EL, ELICE16INDURES; SA, salicylic acid; BABA, beta-amino butyric acid; ABA, abscisic acid; JA, jasmonic acid; GSH, glutathione metabolism; AOE, antioxidant enzymes.

RT-QPCR validation of SA, JA, ABA, GSH pathway genes treated by priming inducing materials (B).

RT-QPCR validation of TIFY domain proteins and RHOMBOID like 2 protein treated by priming inducing materials (C).

All of investigated priming active materials affected positively the expression of TIFY genes, however, it may be concluded that among them ELICE16INDURES induced most strongly these transcription factors.

The deviations shown in the diagrams are linearly scaled at [min, max] intervals. Min: 0.06, max: 1.96 (A); Min: 0.13 Max: 1.98 (B)

946

947

**B**

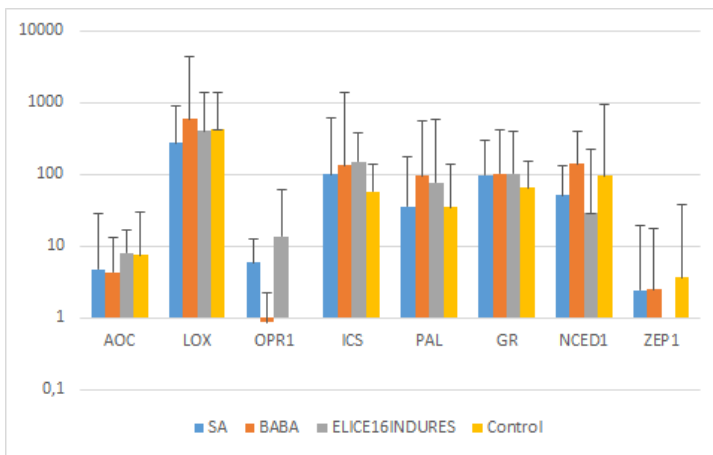

948

949

950

**C**

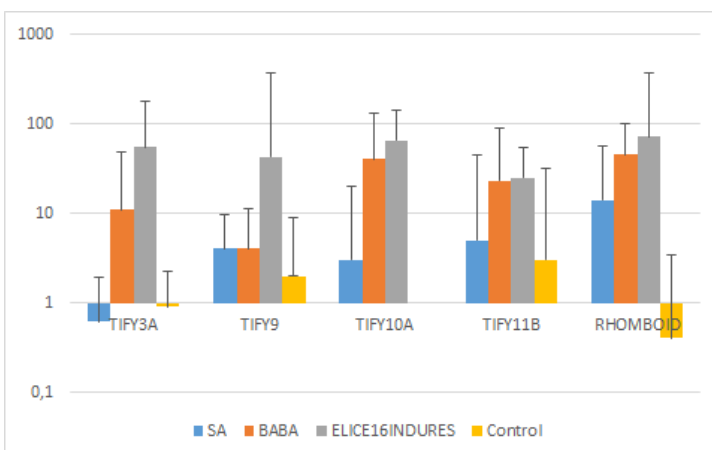

954 **A** 
$$RPM = \frac{\text{mapped reads to a gene} \times 10^6}{\text{total mapped reads}}$$

955

956

957 **B** 
$$d(\vec{v}_i; \vec{v}_j) = \sqrt{\sum_{k=1}^{60615} (x_k^i - x_k^j)^2}$$

958

959 **C** 
$$\begin{array}{cc} \vec{v}_i & \vec{v}_j \\ x_1^i & x_1^j \\ x_2^i & x_2^j \\ \vdots & \vdots \\ x_n^i & x_n^j \end{array}$$

$i, j \in \{1; 2; \dots; 16\}$

$i \neq j$

960 **D** 
$$\sum_{\substack{i, j \in 1..16 \\ i \neq j}} |x_g^i - x_g^j|$$

961 **E** 
$$PRD(X_0, X_1) = \begin{cases} 0 & X_0 = 0, X_1 = 0 \\ \text{empty} & X_0 = 0, X_1 > 0 \\ 100 * (RPM(X_1) - RPM(X_0)) / RPM(X_0) & X_0 > 0 \end{cases}$$

962

963

964

**Figure 7. Formules used for calculations**

**A.** Equation of RPM index used to screening uniquely expressed transcripts and mathematical modeling of interest area. **B.** Equation of distance calculation according to the 2-norm. **C.** 2 elements of the examined n-dimensional vector space, where n = 60,615,  $\vec{v}_i$  and  $\vec{v}_j$  vectors are column vectors of the 1-16 samples in the count table **D.** Equation of change difference of a transcript between the sample pairs. Symbols:  $g$  is the given transcript of the gene;  $x_g$  is the RPM value that belongs to the transcript;  $i, j$  are indexes of the sample pairs. **E.** Percentage of relative difference measured by in investigated genes (GOIs). **X0:** RPM value on day zero, **X1:** RPM value on day second, PRD: percentage relative difference

965
